# Supplementary material for: Substitution of a bridgehead bromide by primary organolithium reagents
Source: Royal Society of Chemistry journal article supplement (doi:10.1039/b308112e), 2003-01-01
Supplement: b308112e.pdf [file b308112e.pdf]

**SUPPLEMENTARY INFORMATION**

**Substitution of a Bridgehead Bromide by Primary Organolithium  
Reagent**

**Michael Harmata\* and Sumrit Wacharasindhu**

**Department of Chemistry  
University of Missouri-Columbia  
Columbia, Missouri 65211**

### General information:

All reactions were carried out under an atmosphere of nitrogen in oven-dried glassware with magnetic stir bar. THF was distilled from sodium/benzophenone and HMPA were distilled from  $\text{CaH}_2$ . Chromatographic separations were carried out using Silicycle ultra pure silica gel (230-400 mesh). Analytical thin layer chromatography was performed on EM Reagent 0.25 mm silica gel 60-F plates. Visualization of the developed chromatogram was performed by phosphomolybdic acid stain solution followed by heating. Infrared spectra were recorded on a Perkin Elmer 1600 series FT-IR spectrometer.  $^1\text{H}$  NMR is recorded on a Bruker ARX-250 (250 MHz), DRX-300 (300 MHz), DRX-500 (500 MHz) spectrometer and are reported in ppm from internal tetramethyl silane. Data are reported as (s = singlet, d = doublet, t = triplet, q = quartet, m = multiplet, dd = doublet of doublet, ddd = doublet of doublet of doublet, integration, coupling constant (Hz), proton assignments).  $^{13}\text{C}$  NMR spectra were recorded on a Bruker ARX-250 (62.5 MHz), DRX-300 (75 MHz), DRX-500 (125 MHz) spectrometer and are reported in ppm from internal tetramethylsilane with solvent resonance employed as the internal standard ( $\text{CDCl}_3$  at 77.0 ppm).

### General procedure for monosubstitution reaction:

To a solution of iodohexane (47  $\mu\text{L}$ , 0.33 mmol) in ether (0.33 mL) was added t-BuLi (0.70 mmol) dropwise at  $-78^\circ\text{C}$ . The mixture was stirred at  $-78^\circ\text{C}$  for 45 min, then 5 min at room temperature. The solution was transferred by syringe to a solution of **1**, (50 mg, 0.22 mmol) in THF/HMPA (20%, 2.2 mL) at  $-78^\circ\text{C}$ . The reaction mixture was stirred at  $-78^\circ\text{C}$  for 4 h, quenched with MeOH (1 mL), warmed to room temperature, and diluted with distilled water. The mixture was extracted with ether (3 X 10 mL), washed with brine (5 mL), dried over  $\text{MgSO}_4$ , filtered and concentrated under reduced pressure. The residue was purified by flash chromatography using 5 % EtOAc/Hexanes to yield ketone **10** (25 mg, 49%) as colorless oil.  $^1\text{H}$  NMR (250 MHz,  $\text{CDCl}_3$ ):  $\delta$  6.17-6.03 (m, 2H), 2.81-2.70 (m, 1H), 2.65 (d,  $J = 2.2$  Hz, 1H), 2.34 (t,  $J = 5.9$  Hz, 1H), 2.04 (d,  $J = 11.1$  Hz, 1H), 1.91-1.59 (m, 3H), 1.59-1.47 (m, 2H), 1.47-1.35 (m, 3H), 1.35-0.825 (m, 7H), 0.96-0.81 (t,  $J = 5.9$  Hz, 3H);  $^{13}\text{C}$  NMR (75.5 MHz,  $\text{CDCl}_3$ ):  $\delta$  214.6, 136.5, 135.5, 54.3, 48.6, 48.3, 45.5, 38.1, 31.7, 31.5, 30.1, 29.2, 24.5, 23.2, 22.6, 14.1; IR (neat) 3056, 2992, 2953, 2930, 2856, 1748, 1480, 1465, 1335, 1097  $\text{cm}^{-1}$ ; Anal. calcd for  $\text{C}_{16}\text{H}_{24}\text{O}$ : C, 82.70, H; 10.41 Found: C, 82.82; H 10.32.

### General procedure for disubstitution reaction:

To a solution of iodohexane (94  $\mu\text{L}$ , 0.66 mmol) in ether (0.66 mL) was added t-BuLi (1.41 mmol) dropwise at  $-78^\circ\text{C}$ . The mixture was stirred at  $-78^\circ\text{C}$  for 45 min, then 5 min at room temperature. The solution was transferred by syringe to a solution of **1** (50 mg, 0.22 mmol) in a mixture of THF/HMPA (20%, 2.2 mL) at  $-78^\circ\text{C}$ . The reaction mixture was stirred at  $-78^\circ\text{C}$  for 4 h, quenched with MeOH (1 mL), warmed to room temperature and diluted with distilled water. The mixture was extracted by ether (3 X 10

mL), washed with brine (5 mL), dried over MgSO<sub>4</sub>, filtered and concentrated under reduced pressure. The residue was purified by flash chromatography using 5 % EtOAc/Hex to yield an alcohol **15** (43mg, 62%) as colorless oil. <sup>1</sup>H NMR (300 MHz, CDCl<sub>3</sub>): δ 6.50 (s, 2H), 4.23-4.13 (t, *J* = 2.7 Hz, 1H), 2.75-2.45 (m, 2H), 2.26-2.09 (m, 2H), 1.81-1.09 (m, 25H), 0.97-0.74 (m, 6H); <sup>13</sup>C NMR (75.5 MHz, CDCl<sub>3</sub>): δ 141.4, 141.1, 86.1, 51.3, 48.3, 44.6, 44.5, 42.5, 37.5, 36.4, 32.7, 32.0, 31.8, 30.6, 30.1, 29.4, 27.6, 25.1, 23.0, 22.6, 14.1; IR (neat) 3603, 3015, 2941, 2847, 1503, 1466, 1376, 1339, 1286, 1066, 747 cm<sup>-1</sup> Anal. calcd for C<sub>22</sub>H<sub>38</sub>O: C, 82.95, H; 12.02 Found: C, 83.12; H 11.79.

**COMPOUND 5:** colorless oil; <sup>1</sup>H NMR (300 MHz, CDCl<sub>3</sub>): δ 6.16-6.04 (m, 2H), 2.78-2.75 (m, 1H), 2.66 (d, *J* = 2.4 Hz, 1H), 2.34 (t, *J* = 12.0 Hz, 1H), 2.04 (d, *J* = 11.1 Hz, 1H), 1.87-1.72 (m, 2H), 1.72-1.60 (m, 1H), 1.60-1.46 (m, 2H), 1.46-1.14 (m, 6H), 0.91 (t, *J* = 14.1 Hz, 3H); <sup>13</sup>C NMR (75.48 MHz, CDCl<sub>3</sub>): δ 214.5, 136.5, 135.5, 54.2, 48.6, 48.3, 45.5, 38.1, 31.2, 29.2, 26.8, 23.5, 23.2, 14.0; IR (neat) 3060, 2961, 2876, 1751, 1469, 1344, 1101cm<sup>-1</sup>; Anal. calcd for C<sub>14</sub>H<sub>20</sub>O: C, 82.30, H; 9.87 Found: C, 82.50; H 9.74.

**COMPOUND 6:** colorless oil; <sup>1</sup>H NMR (250 MHz, CDCl<sub>3</sub>): δ 6.50 (s, 2H), 4.18 (d, *J* = 3.1 Hz, 1H), 2.62-2.50 (m, 2H), 2.31-2.06 (m, 2H), 1.75-1.13 (m, 17H), 1.06-0.75 (m, 6H); <sup>13</sup>C NMR (62.9 MHz, CDCl<sub>3</sub>): δ 141.45, 141.06, 86.1, 51.2, 48.3, 44.6, 44.5, 42.5, 37.2, 36.4, 32.5, 27.5, 27.4, 25.3, 23.9, 23.4, 14.2, 14.1; IR (neat) 3604, 2946, 2927, 1463, 1349 cm<sup>-1</sup>; Anal. calcd for C<sub>18</sub>H<sub>30</sub>O: C, 82.39, H; 11.52 Found: C, 82.54; H 11.36.

**COMPOUND 7:** colorless oil; <sup>1</sup>H NMR (300 MHz, CDCl<sub>3</sub>): δ 6.17-6.06 (m, 2H), 2.81-2.72 (m, 1H), 2.66 (d, *J* = 2.4 Hz, 1H), 2.36 (t, *J* = 6.0 Hz, 1H), 2.06 (d, *J* = 11.0 Hz, 1H), 1.90-1.41 (m, 7H), 0.94 (t, *J* = 8.6 Hz, 1H); <sup>13</sup>C NMR (75.48 MHz, CDCl<sub>3</sub>): δ 214.5, 136.5, 135.6, 54.6, 48.73, 47.90, 45.5, 38.1, 28.8, 24.1, 23.2, 9.0; IR (neat) 3056, 2953, 2880, 1744, 1458, 1335 cm<sup>-1</sup>; Anal. calcd for C<sub>12</sub>H<sub>16</sub>O: C 81.77; H, 9.15. Found: C 81.58; H, 8.99.

**COMPOUND 8:** colorless oil; <sup>1</sup>H NMR (300 MHz, CDCl<sub>3</sub>): δ 6.16-6.04 (m, 2H), 2.78-2.71 (m, 2H), 2.64 (d, *J* = 2.4 Hz, 1H), 2.34 (t, *J* = 6 Hz, 1H), 2.04 (d, *J* = 11.1 Hz, 1H), 1.88-1.58 (m, 3H), 1.58-1.33 (m, 5H), 1.33-1.17 (m, 1H), 0.93 (t, *J* = 6.7 Hz, 3H); <sup>13</sup>C NMR (75.48 MHz, CDCl<sub>3</sub>): δ 214.5, 136.5, 135.5, 54.3, 48.6, 48.4, 45.5, 38.1, 34.0, 29.2, 23.2, 17.9, 14.9; IR (neat) 2949, 2872, 1748, 1454, 1339, 1098, 743 cm<sup>-1</sup>; Anal. calcd for C<sub>13</sub>H<sub>18</sub>O: C, 82.06, H 9.53. Found: C, 82.11; H, 9.39.

**COMPOUND 9:** colorless oil; H NMR (250 MHz, CDCl<sub>3</sub>): δ 6.16-6.04 (m, 2H), 2.78-2.68 (m, 1H), 2.65 (d, *J* = 2.4 Hz, 1H), 2.34 (t, *J* = 12.0, 1H), 2.04 (d, *J* = 11.1 Hz, 1H), 1.89-1.13 (m, 13H), 0.88 (t, *J* = 13.3 Hz, 3H); <sup>13</sup>C NMR (62.9 MHz, CDCl<sub>3</sub>): δ 214.5, 136.6, 135.5, 54.3, 48.6, 48.3, 45.5, 38.1, 32.7, 31.5, 29.2, 24.3, 23.2, 22.6, 14.02; IR (neat) 3056, 2953, 2872, 1748, 1450, 1335, 1090, 963, 898, 743, 710 cm<sup>-1</sup>; Anal. calcd for C<sub>15</sub>H<sub>22</sub>O: C, 82.52, H; 10.16 Found: C, 82.69; H 10.12.

**COMPOUND 11:** colorless oil;  $^1\text{H}$  NMR (300 MHz,  $\text{CDCl}_3$ ):  $\delta$  6.16-6.05 (m, 2H), 2.80-2.71 (m, 1H), 2.65 (d,  $J = 2.1$  Hz, 1H), 2.34 (t,  $J = 5.7$  Hz, 1H), 2.04 (d,  $J = 11.1$  Hz, 1H), 1.90-1.58 (m, 3H), 1.58-1.46 (m, 2H), 1.46-1.11 (m, 12H), 0.88 (t,  $J = 6.5$  Hz, 3H);  $^{13}\text{C}$  NMR (75.5 MHz,  $\text{CDCl}_3$ ):  $\delta$  214.5, 136.5, 135.5, 54.2, 48.6, 48.3, 45.4, 38.1, 31.8, 31.5, 30.4, 29.2, 29.2, 24.5, 23.2, 22.6, 14.1; IR (neat) 3056, 2925, 2855, 1752, 1482, 1458, 1380, 1339, 1098  $\text{cm}^{-1}$ ; Anal. calcd for  $\text{C}_{17}\text{H}_{26}\text{O}$ : C, 82.87, H; 10.64 Found: C, 82.66; H 10.67

**COMPOUND 12:** colorless oil;  $^1\text{H}$  NMR (250 MHz,  $\text{CDCl}_3$ ):  $\delta$  6.50 (s, 2H), 4.14 (d,  $J = 3.2$  Hz, 1H), 2.67-2.47 (m, 2H), 2.19 (d,  $J = 8.7$  Hz, 2H), 1.73-1.30 (m, 9H), 0.97 (t,  $J = 7.4$  Hz, 3H), 0.84 (t,  $J = 7.3$  Hz, 3H);  $^{13}\text{C}$  NMR (62.9 MHz,  $\text{CDCl}_3$ ):  $\delta$  141.5, 140.9, 86.0, 51.5, 47.6, 44.6, 44.5, 41.8, 36.1, 29.7, 27.3, 24.9, 9.5, 7.38; IR (neat), 3598, 2922, 2852, 1496, 1468  $\text{cm}^{-1}$ ; Anal. calcd for  $\text{C}_{14}\text{H}_{22}\text{O}$ : C, 81.50, H; 10.75 Found: C, 82.36; H 10.66

**COMPOUND 13:** colorless oil;  $^1\text{H}$  NMR (250 MHz,  $\text{CDCl}_3$ ):  $\delta$  6.49 (s, 2H), 4.16 (d,  $J = 3.0$  Hz, 1H), 2.66-2.47 (m, 2H), 2.26-2.10 (m, 2H), 1.75-1.10 (m, 13H), 1.00-0.87 (m, 6H);  $^{13}\text{C}$  NMR (62.9 MHz,  $\text{CDCl}_3$ ):  $\delta$  141.4, 141.0, 86.1, 51.3, 48.3, 44.6, 44.5, 42.5, 39.9, 36.4, 35.3, 27.5, 18.4, 16.2, 15.3, 14.8; IR (neat) 3608, 2958, 2932, 1463, 1338  $\text{cm}^{-1}$ ; Anal. calcd for  $\text{C}_{16}\text{H}_{26}\text{O}$ : C, 81.99, H; 11.18 Found: C, 82.10; H 11.13.

**COMPOUND 14:** colorless oil;  $^1\text{H}$  NMR (250 MHz,  $\text{CDCl}_3$ ):  $\delta$  6.50 (s, 2H), 4.16 (d,  $J = 2.9$  Hz, 1H), 2.66-2.46 (m, 2H), 2.26-2.11 (m, 2H), 1.74-1.09 (m, 21H), 1.00-0.75 (m, 6H);  $^{13}\text{C}$  NMR (62.9 MHz,  $\text{CDCl}_3$ ):  $\delta$  141.4, 141.1, 86.1, 51.3, 48.3, 44.6, 44.5, 42.5, 37.4, 36.4, 33.1, 32.7, 32.6, 27.6, 24.8, 22.8, 22.7, 22.6, 14.1; IR (neat) 3583, 3047, 3015, 2953, 2929, 2855, 1736, 1544, 1495, 1470, 1376, 1266, 1172, 1057, 906  $\text{cm}^{-1}$  Anal. calcd for  $\text{C}_{20}\text{H}_{34}\text{O}$ : C, 82.69, H; 11.80 Found: C, 82.80; H 12.00.

**COMPOUND 16:** colorless oil;  $^1\text{H}$  NMR (250 MHz,  $\text{CDCl}_3$ ):  $\delta$  6.49 (s, 2H), 4.16 (d,  $J = 2.6$  Hz, 1H), 2.66-2.47 (m, 2H), 2.28-2.11 (m, 2H), 1.77-1.07 (m, 29H), 0.94-0.81 (m, 6H);  $^{13}\text{C}$  NMR (62.9 MHz,  $\text{CDCl}_3$ ):  $\delta$  141.4, 141.1, 86.1, 51.3, 48.2, 44.6, 45.5, 42.5, 37.5, 36.4, 32.7, 31.9, 31.9, 30.8, 29.4, 29.3, 27.6, 25.2, 23.1, 22.6, 14.1; IR (neat) 3603, 3342, 3068, 3019, 2949, 2925, 2851, 1597, 1454, 1376, 963, 747  $\text{cm}^{-1}$ ; Anal. calcd for  $\text{C}_{24}\text{H}_{42}\text{O}$ : C, 83.17, H; 12.21, Found: C, 82.01; H 12.01.

**COMPOUND 25:** colorless oil;  $^1\text{H}$  NMR (250 MHz,  $\text{CDCl}_3$ ):  $\delta$  6.16-6.06 (m, 2H), 2.75 (s, 2H), 2.38-2.33 (t,  $J = 6.0$  Hz, 1H), 2.08-2.04 (d,  $J = 11$  Hz, 1H), 1.88-0.94 (m, 16H);  $^{13}\text{C}$  NMR (62.9 MHz,  $\text{CDCl}_3$ ):  $\delta$  214.4, 136.7, 135.3, 54.4, 48.2, 47.3, 45.3, 37.9, 36.9, 36.8, 34.8, 34.1, 29.6, 25.0, 24.7, 23.3; IR (neat) 2950, 2878, 1756, 1448  $\text{cm}^{-1}$ ; HRMS calcd for  $\text{C}_{16}\text{H}_{22}\text{ONa}$   $[\text{M} + \text{Na}]^+$  253.15628, found 253.15686.

**COMPOUND 26:** colorless oil;  $^1\text{H}$  NMR (250 MHz,  $\text{CDCl}_3$ ):  $\delta$  6.16-6.06 (m, 2H), 5.89-5.73 (m, 1H) 5.05-4.91 (m, 2H), 2.78-2.65 (m, 2H), 2.35 (t,  $J = 5.9$  Hz, 3H), 2.12-2.03 (m, 3H), 1.87-1.65 (m, 3H), 1.57-1.23 (m, 8H);  $^{13}\text{C}$  NMR (62.9 MHz,  $\text{CDCl}_3$ ):  $\delta$  214.4, 138.9, 136.6, 135.5, 114.3, 54.27, 48.6, 48.3, 45.5, 38.1, 33.6, 31.3, 29.6, 29.2, 24.0, 23.2; IR (neat) 3060, 2929, 1744, 1642  $\text{cm}^{-1}$ ; HRMS calcd for  $\text{C}_{16}\text{H}_{22}\text{ONa}$   $[\text{M} + \text{Na}]^+$  253.15628, found 253.1581

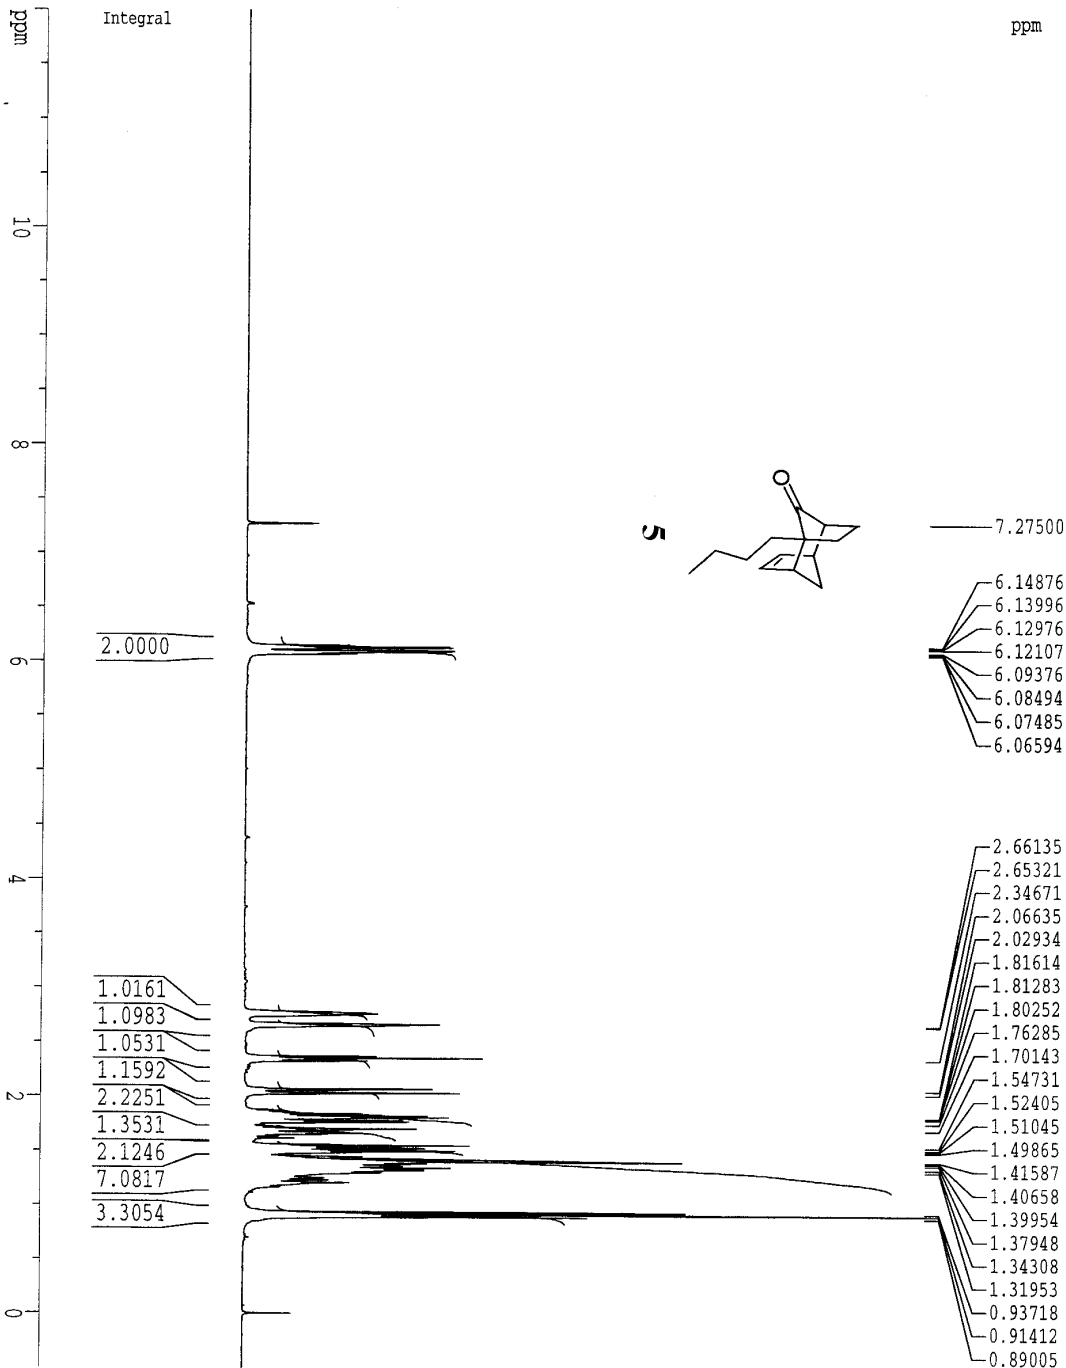

Current Data Parameters  
 NAME sw-II-63-A3  
 EXPNO 1  
 PROCNO 1

F2 - Acquisition Parameters  
 Date\_ 20011009  
 Time 11.09

INSTRUM dx300  
 PROBHD 5 mm BBO BB-1H  
 PULPROG zg30  
 TD 32768  
 SOLVENT CDCl3  
 NS 16  
 DS 2  
 SMH 6172.839 Hz  
 FIDRES 0.188380 Hz  
 AQ 2.6542580 sec  
 RG 128  
 DM 81.000 usec  
 DE 6.00 usec  
 TE 300.0 K  
 D1 1.00000000 sec  
 P1 7.50 usec  
 DE 6.00 usec  
 SF01 300.1317708 MHz  
 NUC1 1H  
 PL1 0.00 dB

F2 - Processing parameters  
 SI 16384  
 SF 300.1300015 MHz  
 WDW EM  
 SSB 0  
 LB 0.30 Hz  
 GB 0  
 PC 1.50

ID NMR plot parameters  
 CX 20.00 cm  
 CY 12.50 cm  
 F1P 12.000 ppm  
 F1 3601.56 Hz  
 F2P -0.500 ppm  
 F2 -150.07 Hz  
 PPMCM 0.62500 ppm/cm  
 HZCM 187.58125 Hz/cm

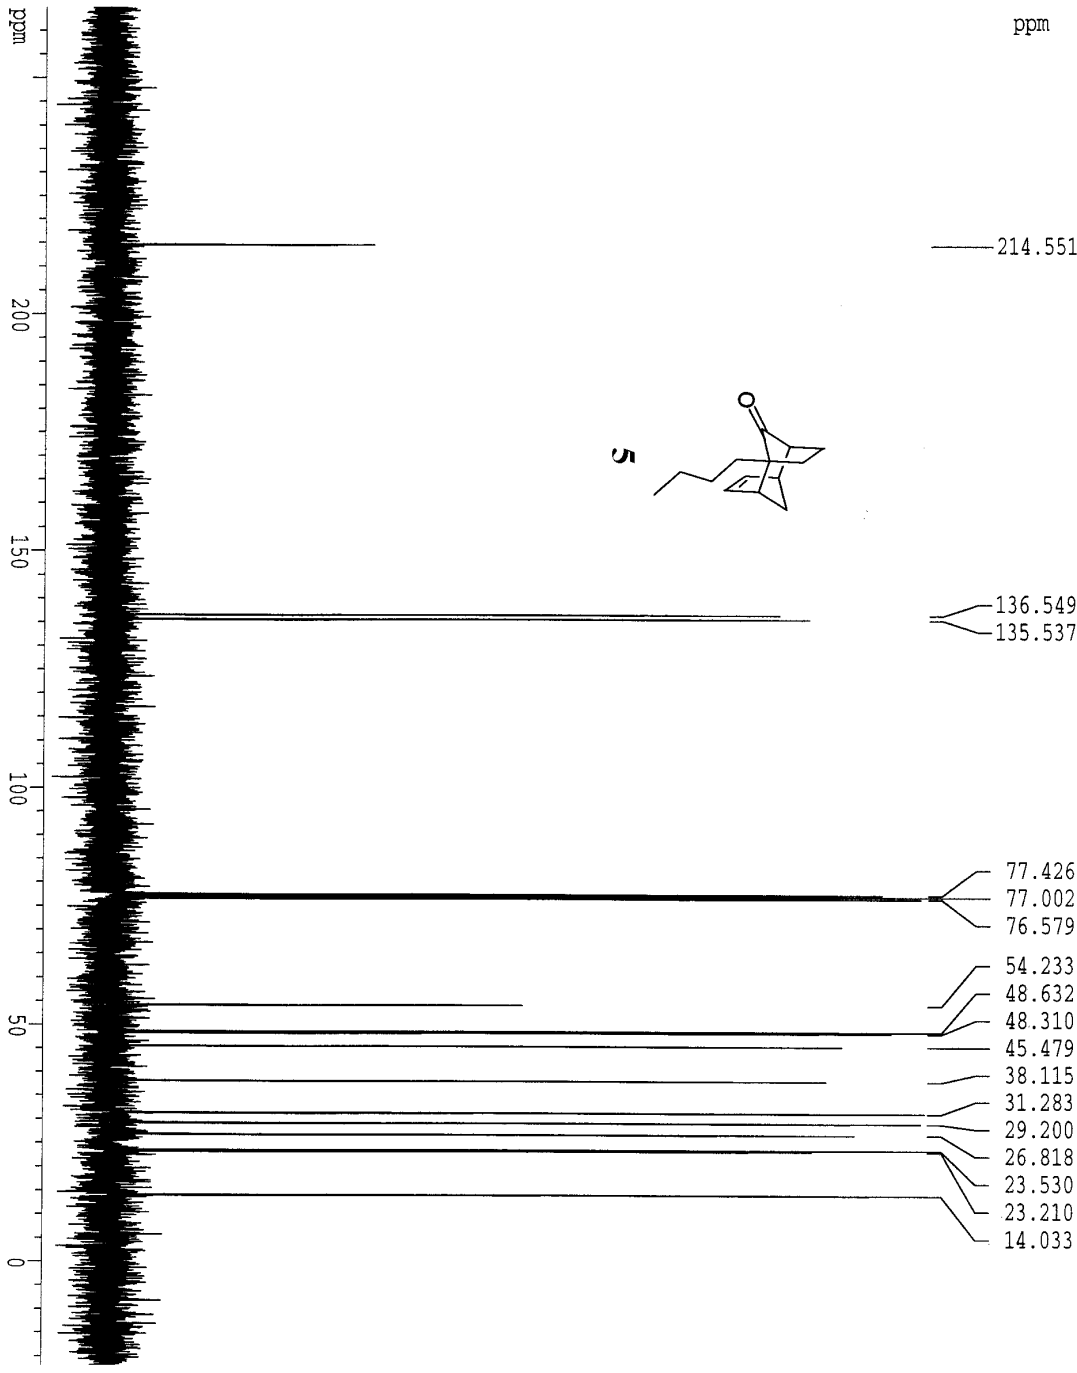

Current Data Parameters  
 NAME sw-II-63-A3  
 EXPNO 2  
 PROCNO 1

F2 - Acquisition Parameters  
 Date\_ 201109  
 Time 11.12

INSTRUM drx300  
 PROBHD 5 mm BBO BB-1H  
 PULPROG zgpg30  
 TD 65536  
 SOLVENT CDCl3  
 NS 98  
 DS 4

SWH 21645.021 Hz  
 FIDRES 0.330277 Hz  
 AQ 1.5139316 sec  
 RG 32768  
 DW 23.100 usec  
 DE 6.00 usec  
 TE 300.0 K  
 D11 0.03000000 sec  
 P112 24.50 dB  
 CPDPRG2 waltz16

PCPD2 100.00 usec  
 SFO2 300.1315007 MHz  
 NUC2 1H  
 PL2 0.00 dB  
 D1 1.00000000 sec  
 P1 7.75 usec  
 DE 6.00 usec  
 SFO1 75.4769164 MHz  
 NUC1 13C  
 PL1 6.00 dB

F2 - Processing parameters  
 SI 32768  
 SF 75.4677518 MHz  
 WDW EM  
 SSB 0  
 LB 1.00 Hz  
 GB 0  
 PC 1.40

ID NMR plot parameters  
 CX 20.00 cm  
 CY 12.50 cm  
 F1P 264.844 ppm  
 F1 19987.16 Hz  
 F2P -21.968 ppm  
 F2 -1657.86 Hz

PRMCM 14.34058 ppm/cm  
 HZCM 1082.25110 Hz/cm

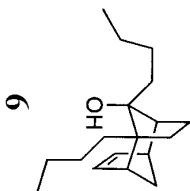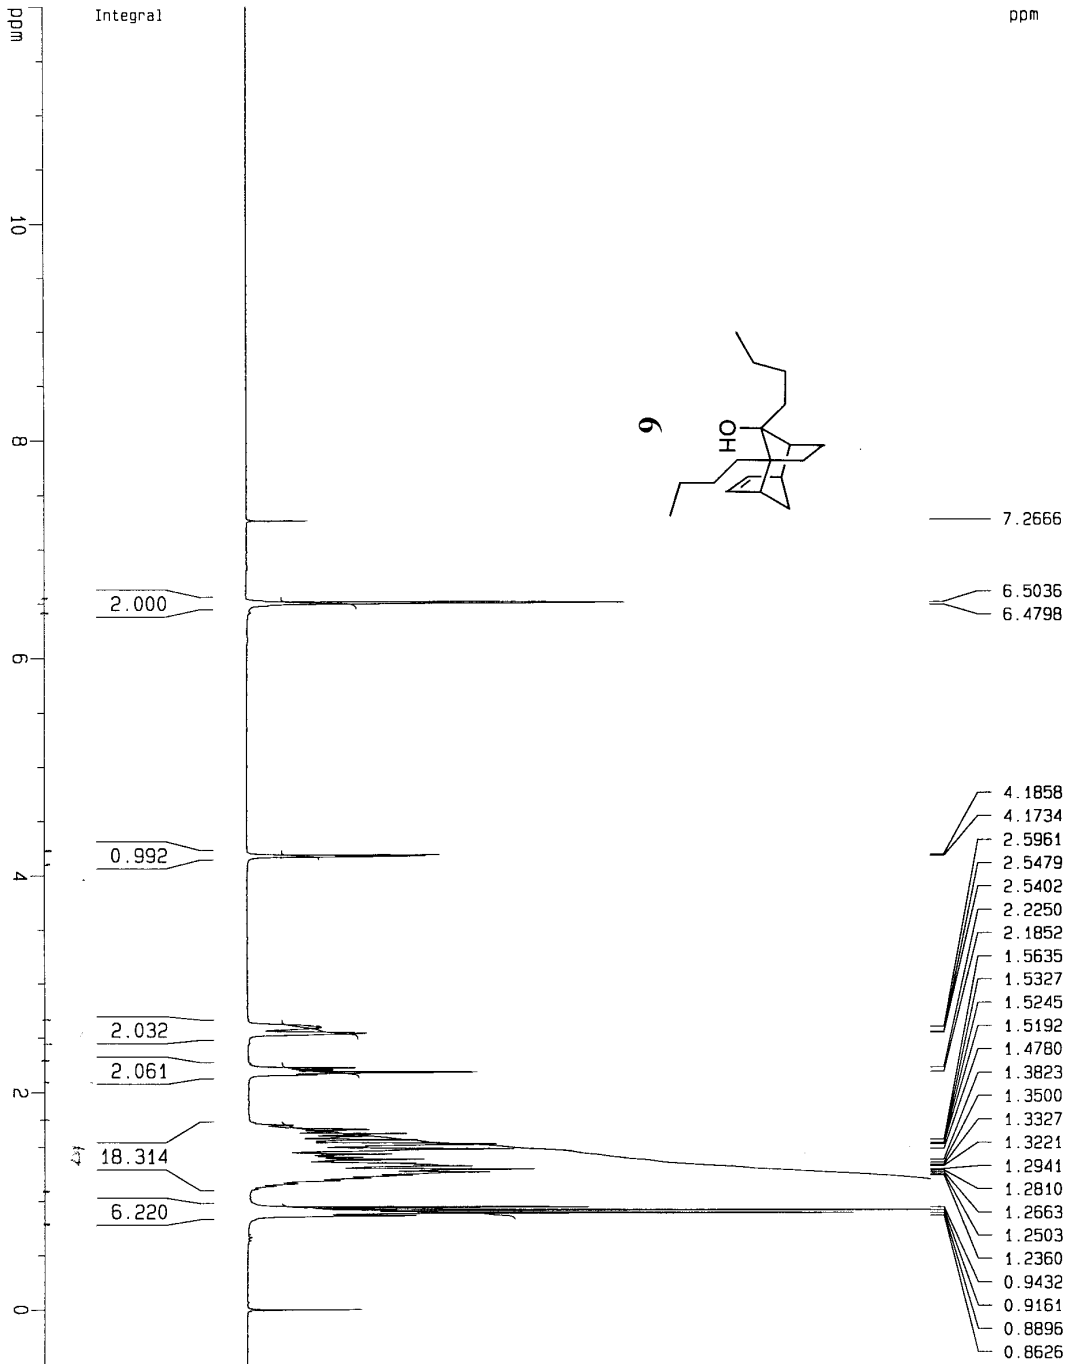

Current Data Parameters  
 NAME SW-11-46-A1  
 EXPNO 1  
 PROCNO 1

F2 - Acquisition Parameters  
 Date\_ 20010918  
 Time 22.42  
 INSTRUM apt250  
 PROBHD 5 mm QNP 1H  
 PULPROG zg30  
 TD 32768  
 SOLVENT CDCl3  
 NS 16  
 DS 2  
 SMH 5208.333 Hz  
 FIDRES 0.158946 Hz  
 AQ 3.1457779 sec  
 RG 512  
 DM 96.000 use  
 DE 137.14 use  
 TE 300.0 K  
 D1 1.00000000 sec  
 P1 8.70 use  
 SF01 250.1315221 MHz  
 NUCLEUS 1H

F2 - Processing parameters  
 SI 16384  
 SF 250.1300059 MHz  
 WDW EM  
 SSB 0  
 LB 0.20 Hz  
 GB 0  
 PC 1.50

1D NMR plot parameters  
 CX 20.00 cm  
 F1P 12.000 ppm  
 F1 3001.56 Hz  
 F2P -0.500 ppm  
 F2 -125.07 Hz  
 PPMCM 0.52500 ppm  
 HZCM 156.33125 Hz/

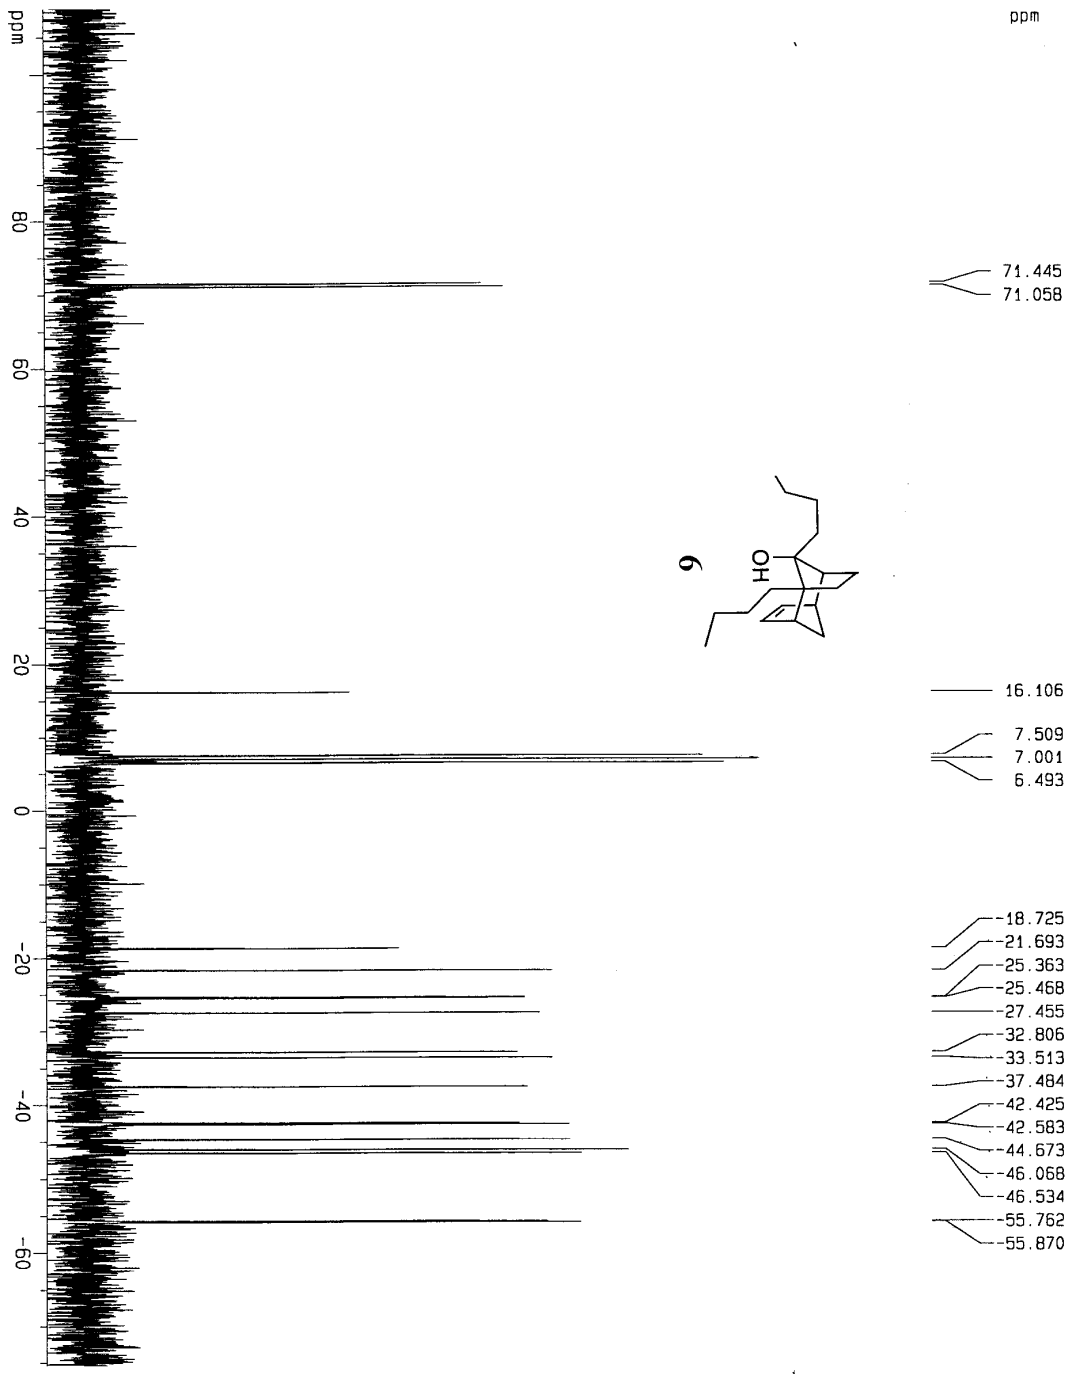

Current Data Parameters  
 NAME SW-11-46-A1  
 EXPNO 2  
 PROCNO 1

F2 - Acquisition Parameters  
 Date\_ 20010918  
 Time 22.45  
 INSTRUM arx250  
 PROBHD 5 mm QNP 1H  
 PULPROG zgpg30  
 TD 36864  
 SOLVENT CDCl3  
 NS 60  
 DS 4  
 SMH 17241.379 Hz  
 FIDRES 0.467702 Hz  
 AQ 1.0691060 sec  
 RG 22800  
 DM 29.000 use  
 DE 41.43 use  
 TE 300.0 K  
 D12 0.00002000 sec  
 DL5 23.00 dB  
 CPDPRG waitz16  
 P31 103.00 use  
 D1 1.00000000 sec  
 P1 5.35 use  
 SF01 62.9023694 MHz  
 NUCLEUS 13C  
 D11 0.03000000 sec

F2 - Processing Parameters  
 SI 32768  
 SF 62.8996434 MHz  
 MDW EM  
 SSB 0  
 LB 1.00 Hz  
 GB 0  
 PC 1.40

1D NMR plot parameters  
 CX 20.00 cm  
 F1P 108.898 ppm  
 F1 6849.64 Hz  
 F2P -75.371 ppm  
 F2 -4740.78 Hz  
 PPMCM 9.21342 ppm  
 HZCM 579.52081 Hz/



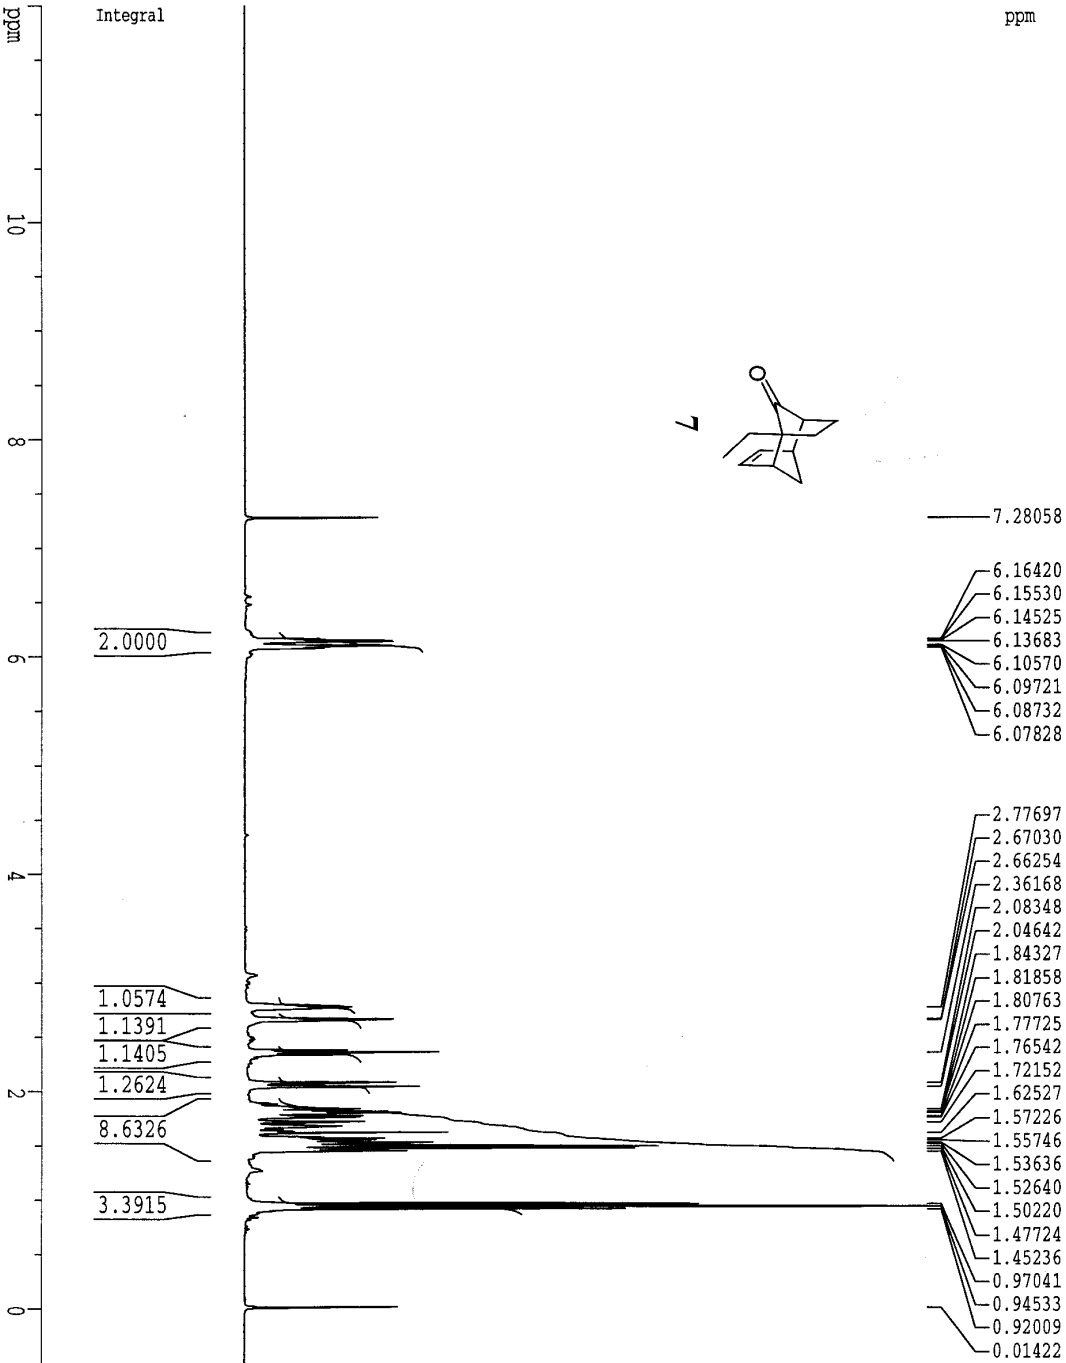

Current Data Parameters  
 NAME sw-III-54-A1  
 EXPNO 1  
 PROCNO 1

F2 - Acquisition Parameters  
 Date\_ 20020408  
 Time 21.07

INSTRUM drx300  
 PROBHD 5 mm BBO BB-1H  
 PULPROG zg30  
 TD 32768  
 SOLVENT CDC13

NS 16  
 DS 2  
 SWH 6172.839 Hz  
 FIDRES 0.188380 Hz  
 AQ 2.6542580 sec

RG 256  
 DW 81.000 usec  
 DE 6.00 usec  
 TE 300.0 K

D1 1.00000000 sec  
 P1 7.50 usec  
 DE 6.00 usec

SFO1 300.1317708 MHz  
 NUC1 1H  
 PL1 0.00 dB

F2 - Processing parameters  
 SI 16384  
 SF 300.1300000 MHz  
 WDW EM  
 SSB 0  
 LB 0.30 Hz  
 GB 0  
 PC 1.50

1D NMR plot parameters  
 CX 20.00 cm  
 CY 12.50 cm  
 FILP 12.000 ppm  
 F1 3601.56 Hz  
 F2P -0.500 ppm  
 F2 -150.07 Hz  
 PEVCM 0.62500 ppm/cm  
 HZCM 187.58125 Hz/cm

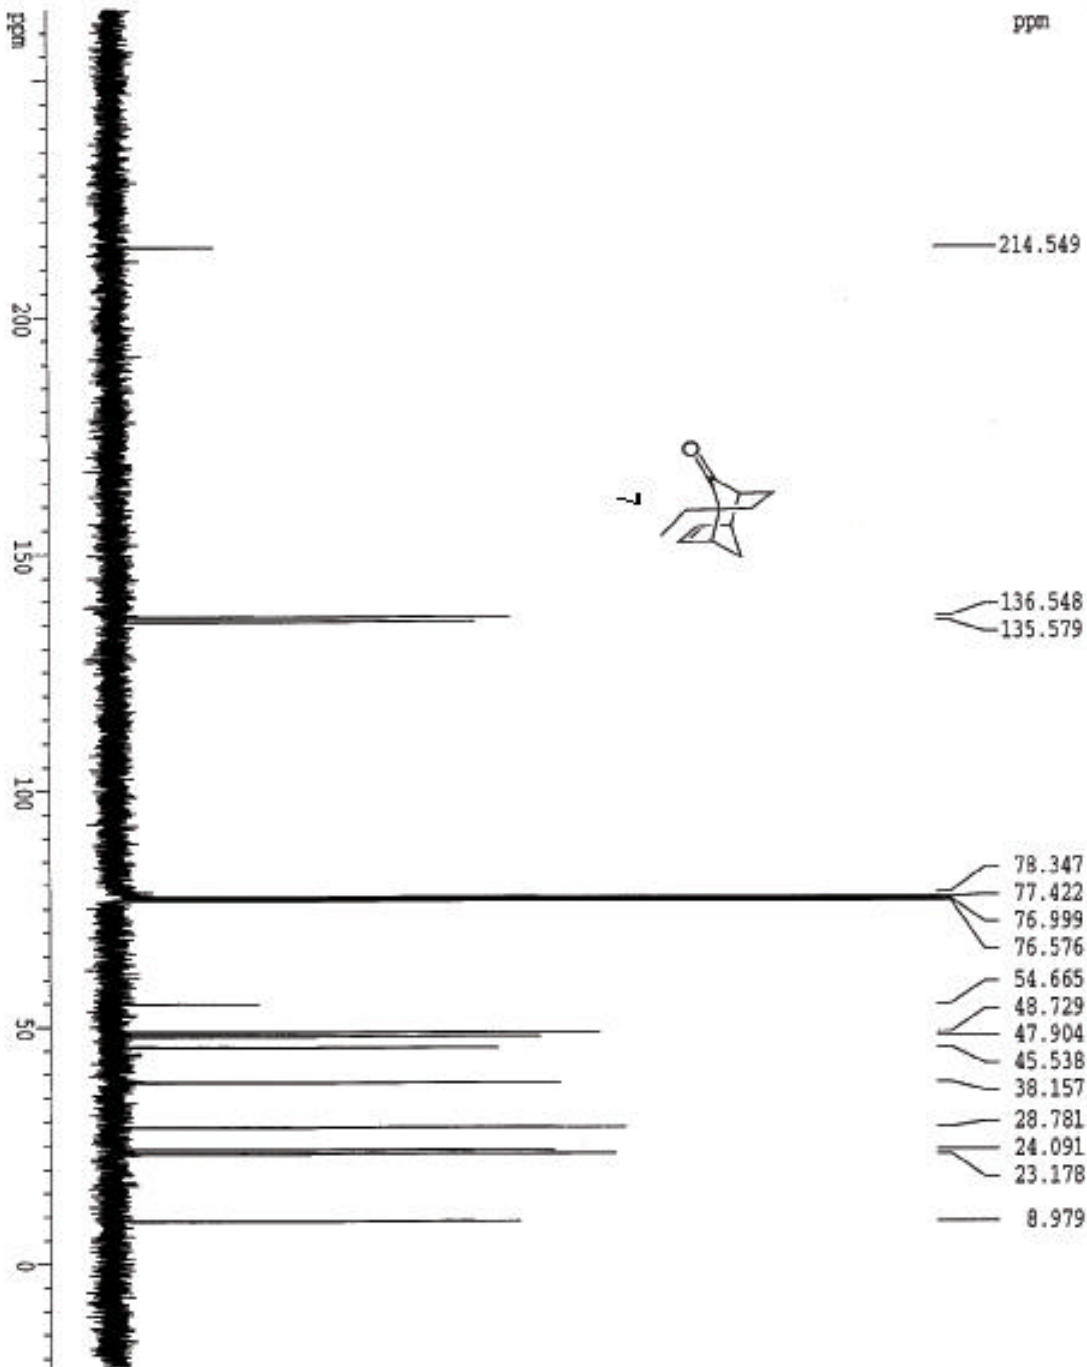

Current Data Parameters  
 NAME 8W-11T-54-A1  
 EXPNO 2  
 PROCNO 1

F2 - Acquisition Parameters  
 Date\_ 20020408  
 Time 21.12  
 INSTRUM dxt100  
 PROBRD 5 mm BBO BB-1H  
 PULPROG zgpg30  
 TD 65536  
 SOLVENT CDCl3  
 NS 708  
 DS 4

SI 21645.021 Hz  
 FIDRES 0.330277 Hz  
 AQ 1.5139316 sec  
 RG 32764  
 DW 23.100 usec  
 DE 6.00 usec  
 TE 300.0 K  
 D11 0.01000000 sec  
 P112 24.50 dB  
 CHPROG2 waltz16

REPRO2 100.00 usec  
 SFO2 300.1315007 MHz  
 NUC2 13C  
 P12 0.00 dB  
 D1 1.00000000 sec  
 P1 7.75 usec  
 DE 6.00 usec  
 SFO1 75.4759164 MHz  
 NUC1 13C  
 P11 6.00 dB

F2 - Processing Parameters  
 SI 32768  
 SF 75.4677505 MHz  
 NEM EM  
 SSB 0  
 LB 1.00 Hz  
 GB 0  
 PC 1.40

ID MSN plot parameters  
 CX 20.00 cm  
 CY 15.00 cm  
 PIP 264.861 ppm  
 F1 19988.48 Hz  
 F2P -21.950 ppm  
 F2 -1656.54 Hz  
 FPMASK 14.34658 ppm/cm  
 SFOCM 1082.25098 Hz/cm

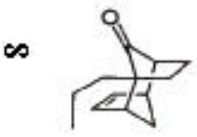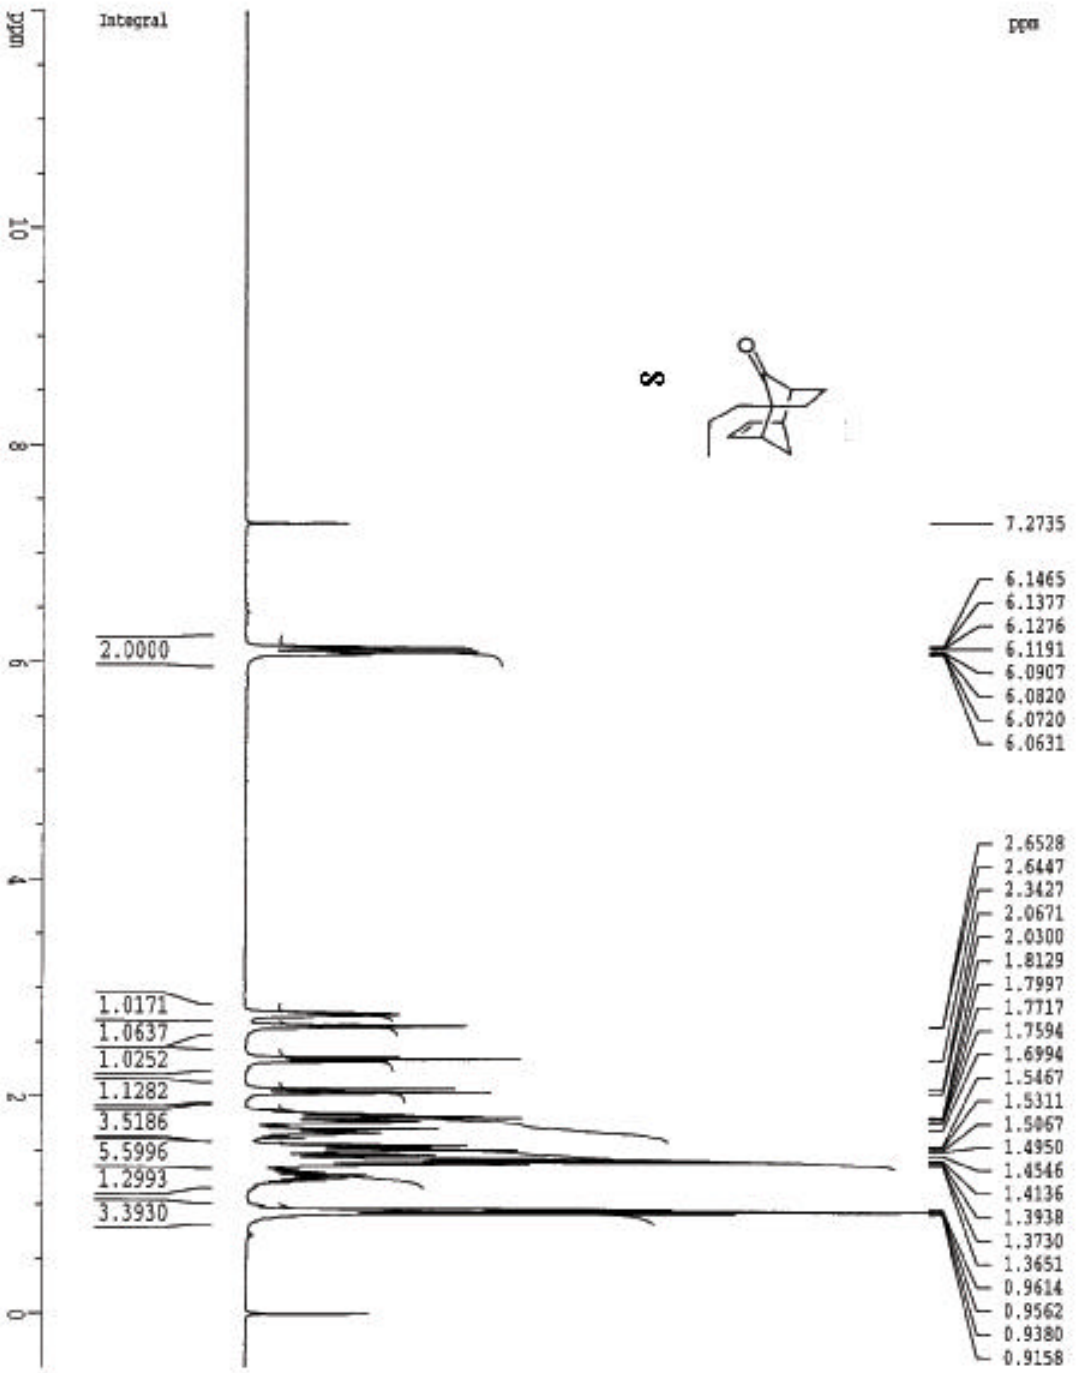

Current Data Parameters  
 NAME SW-III-53-A1  
 EXPMO 1  
 PROCNO 1

F2 - Acquisition Parameters  
 Date\_ 20020408  
 Time 21.45  
 INSTRM dxr300  
 PROBD 5 mm BBO SB-1H  
 PULPROG zg30  
 PD 32768  
 SOLVENT CDC13  
 NS 16  
 DS 2  
 SWH 6172.839 Hz  
 FIDRES 0.186380 Hz  
 AQ 2.6542580 sec  
 RG 128  
 DW 81.000 usec  
 DE 6.00 usec  
 GE 300.0 K  
 D1 1.00000000 sec  
 P1 7.50 usec  
 DE 6.00 usec  
 SFO1 300.1317708 MHz  
 NUC1 1H  
 PC1 0.00 dB

F2 - Processing parameters  
 SI 16384  
 SF 300.1300015 MHz  
 WDW EM  
 SSB 0  
 LB 0.30 Hz  
 GB 0  
 PC 1.50

ID parameters  
 CX 20.00 cm  
 CY 15.00 cm  
 F1P 12.000 PPM  
 F1 3601.56 Hz  
 F2P -0.500 PPM  
 F2 -150.07 Hz  
 PPMCK 0.62500 PPM/cm  
 HZCK 187.58125 Hz/cm

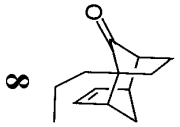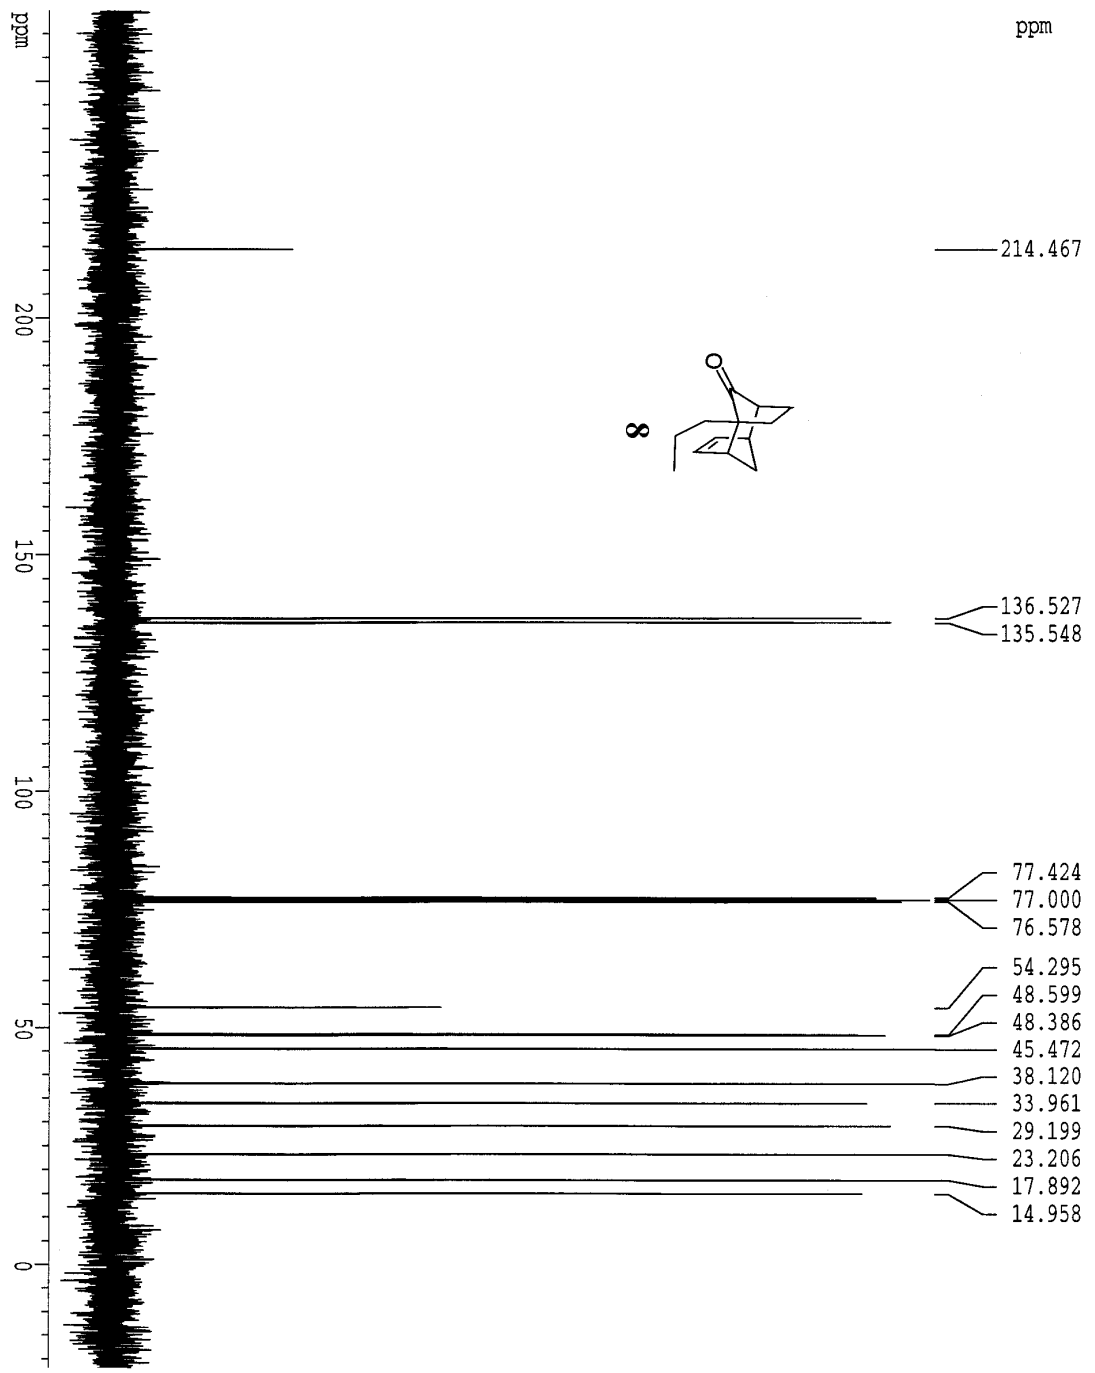

Current Data Parameters  
 NAME sw-111-53-A1  
 EXPNO 2  
 PROCNO 1

F2 - Acquisition Parameters  
 Date\_ 20020408  
 Time 21.48

INSTRUM dtx300  
 PROBHD 5 mm BBO BB-1H  
 PULPROG zgpg30

TD 65536  
 SOLVENT CDCl3  
 NS 117  
 DS 4

SWH 21645.021 Hz  
 FIDRES 0.330277 Hz  
 AQ 1.5139316 sec

RG 32768  
 DW 23.100 usec  
 DE 6.00 usec  
 TE 300.0 K

D11 0.03000000 sec  
 PL12 24.50 dB  
 CPDPRG2 waltz16

PCPD2 100.00 usec  
 SFO2 300.1315007 MHz  
 NUC2 1H

PL2 0.00 dB  
 D1 1.00000000 sec  
 P1 7.75 usec

DE 6.00 usec  
 SFO1 75.4769164 MHz  
 NUC1 13C

PL1 6.00 dB

F2 - Processing parameters  
 SI 32768  
 SF 75.4677518 MHz

WDW EM  
 SSB 0  
 LB 1.00 Hz  
 GB 0  
 PC 1.40

1D NMR plot parameters  
 CX 20.00 cm  
 CY 12.50 cm

F1P 264.844 ppm  
 F1 19987.16 Hz  
 F2P -21.968 ppm  
 F2 -1657.86 Hz

PPMCM 14.34058 ppm/cm  
 HZCM 1082.25098 Hz/cm

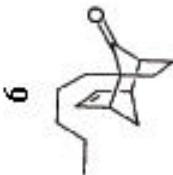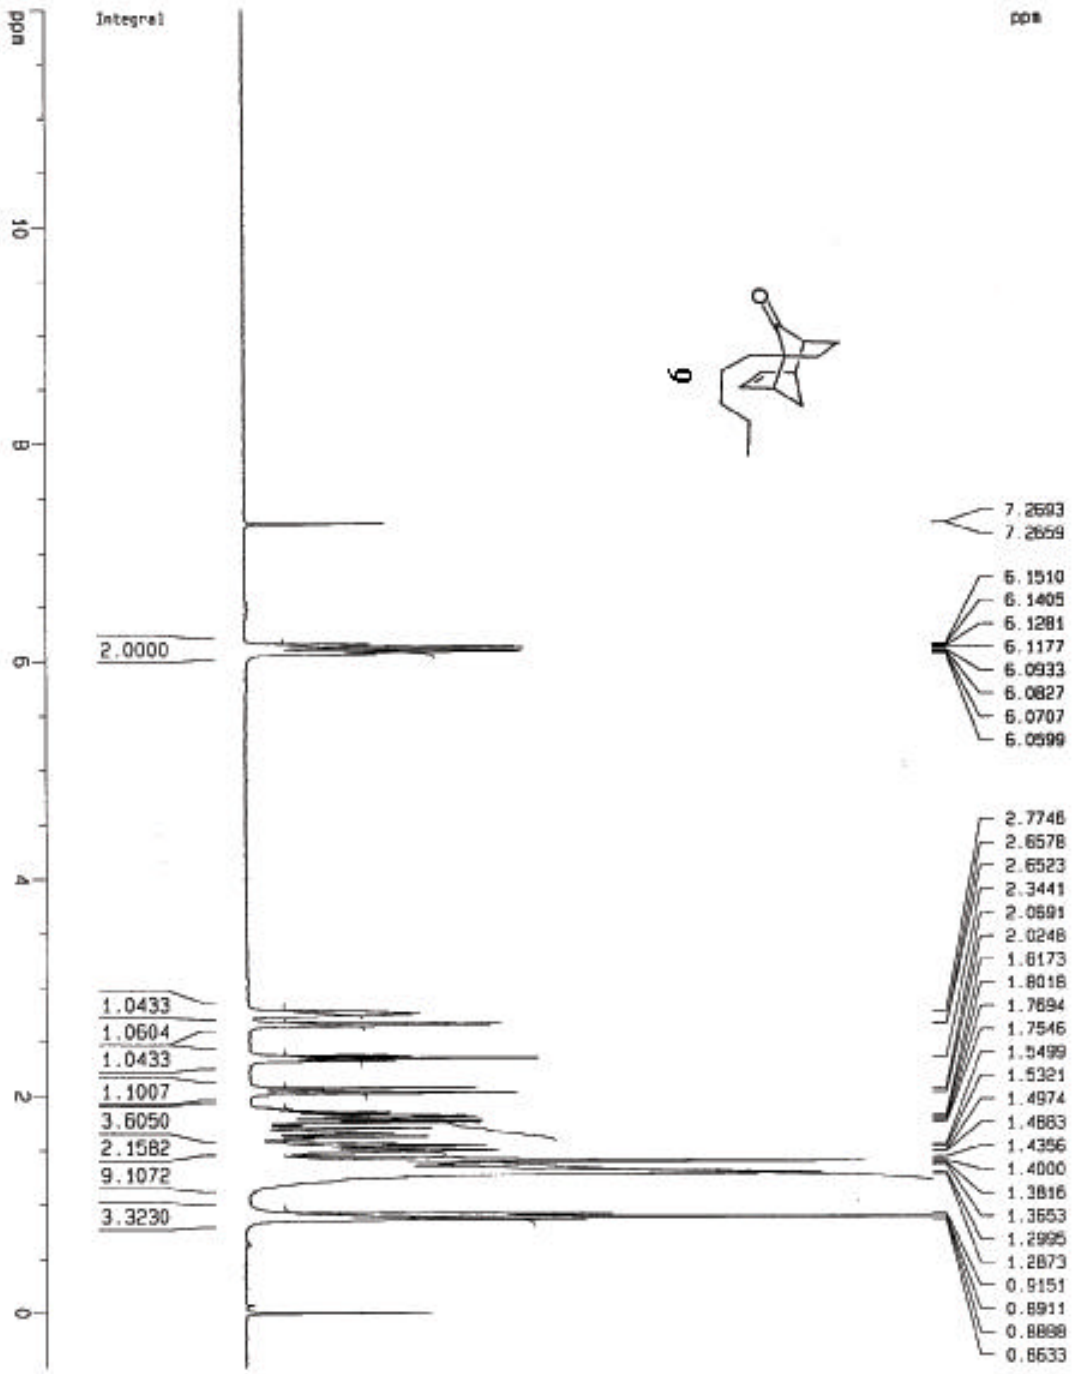

Current Data Parameters  
 NAME SW-III-60-A2  
 EXPNO 1  
 PROCNO 1

F2 - Acquisition Parameters  
 Date\_ 20020413  
 Time 23.32  
 INSTRUM 400250  
 PULPROG 5 PR OMP 1H  
 TD 16380  
 SOLVENT CDCl3  
 NS 16  
 DS 2  
 SMH 5209.333 Hz  
 FIDRES 0.158946 Hz  
 AQ 3.1457778 sec  
 RG 715  
 QW 95.000 u88  
 DE 137.14 u58  
 TE 300.0 K  
 D1 1.00000000 sec  
 P1 8.70 u88  
 SFO1 250.1315321 MHz  
 NUCLEUS 1H

F2 - Processing parameters  
 SI 16384  
 SF 250.1300056 MHz  
 WDW EM  
 SSB 0  
 LB 0.20 Hz  
 GB 0  
 PC 1.50

3D NMR plot parameters  
 CX 20.00 cm  
 CY 12.50 cm  
 FXP 12.000 ppm  
 F1 3001.56 Hz  
 F2 -0.500 ppm  
 F3 -129.07 Hz  
 PPMX0 0.82500 ppm  
 HZXM 156.33129 Hz/

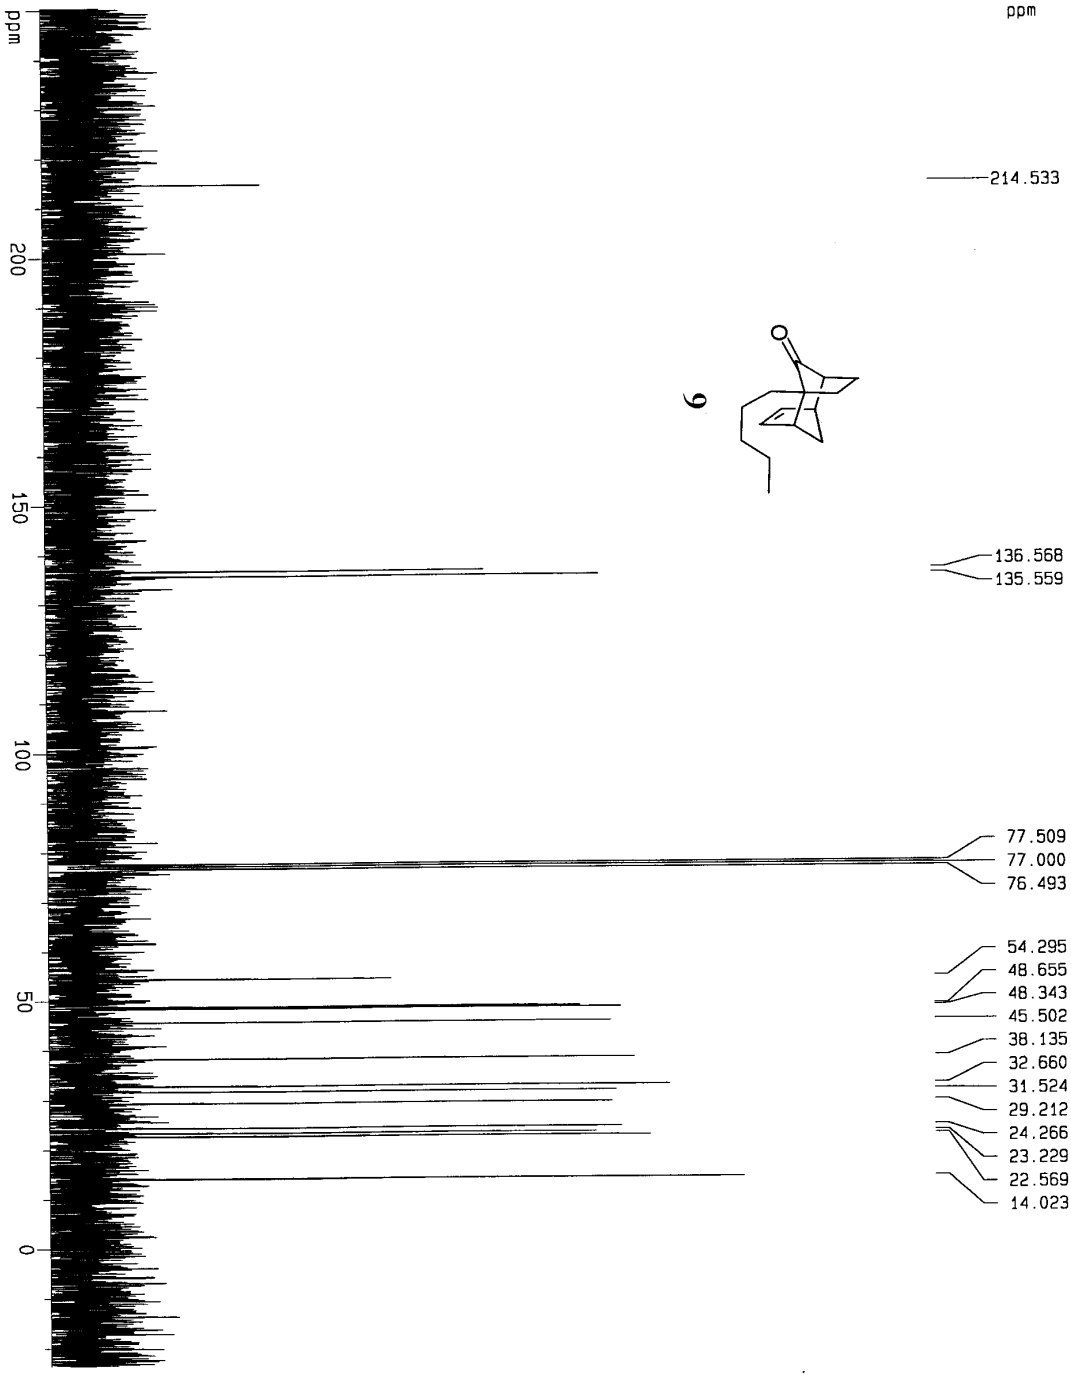

Current Data Parameters  
 NAME SW-III-60-A2  
 EXPNO 2  
 PROCNO 1

F2 - Acquisition Parameters

Date\_ 20020413  
 Time 23.34  
 INSTRUM arx250  
 PROBRD 5 mm QNP 1H  
 PULPROG zgpg30  
 TD 36864  
 SOLVENT CDCl3  
 NS 105  
 DS 4  
 SMH 17241.379 Hz  
 FIDRES 0.467702 Hz  
 AQ 1.0691060 sec  
 RG 22800  
 DM 29.000 use  
 DE 41.43 use  
 TE 300.0 K  
 D12 0.00002000 sec  
 D15 23.00 dB  
 CPDPRG waitz16  
 P31 103.00 use  
 D1 1.00000000 sec  
 P1 5.35 use  
 SF01 62.9023694 MHz  
 NUCLEUS 13C  
 D11 0.03000000 sec

F2 - Processing parameters

SI 32768  
 SF 62.8952408 MHz  
 WDW EM  
 SSB 0  
 LB 1.00 Hz  
 GB 0  
 PC 1.40

1D NMR plot parameters

CX 20.00 cm  
 CY 18.00 cm  
 F1P 250.405 ppm  
 F1 15749.28 Hz  
 F2P -23.724 ppm  
 F2 -1492.10 Hz  
 PPKCM 13.70643 ppm  
 HZCM 862.06891 Hz/

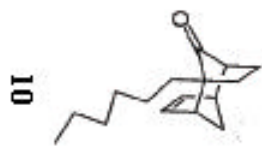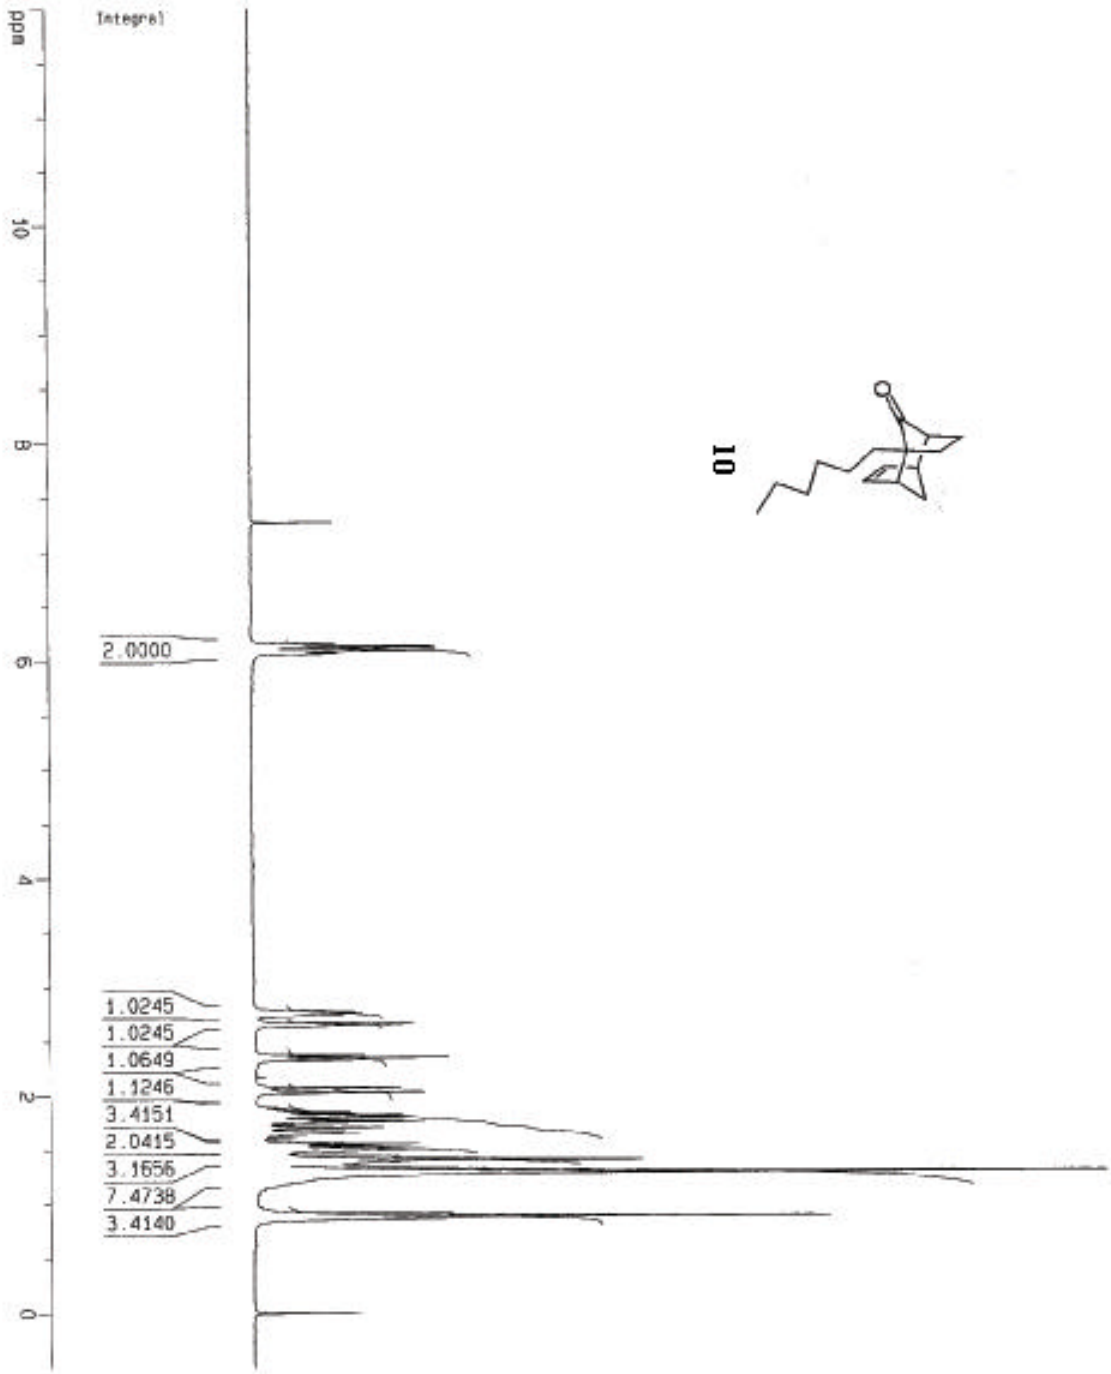

Current Data Parameters  
 NAME SW-11-74-A2  
 EXPNO 1  
 PROCNO 1

F2 - Acquisition Parameters  
 Date\_ 20011026  
 Time 0.37  
 INSTRUM ark250  
 PROBNM 5 mm QNP 1H  
 PULPROG zg30  
 TD 32768  
 TO 32768  
 SOLVENT CDCl3  
 NS 16  
 DS 2  
 SWH 5208.333 Hz  
 FIDRES 0.158946 Hz  
 AQ 3.1457779 sec  
 RG 715  
 CW 98.000 use  
 DE 137.14 use  
 TE 300.0 K  
 D1 1.00000000 sec  
 P1 E. 70 use  
 SFO1 250.1315021 MHz  
 NUCLEUS 1H

F2 - Processing parameters  
 SI 16384  
 SF 250.1300049 MHz  
 WDM EN  
 SSB 0  
 LB 0.20 Hz  
 BB 0  
 PC 1.50

1D NMR plot parameters  
 CK 20.00 cm  
 F1P 12.000 ppm  
 F1 3001.56 Hz  
 F2P -0.500 ppm  
 F2 -125.07 Hz  
 FWHM 0.62500 ppm  
 HZCN 156.33125 Hz/

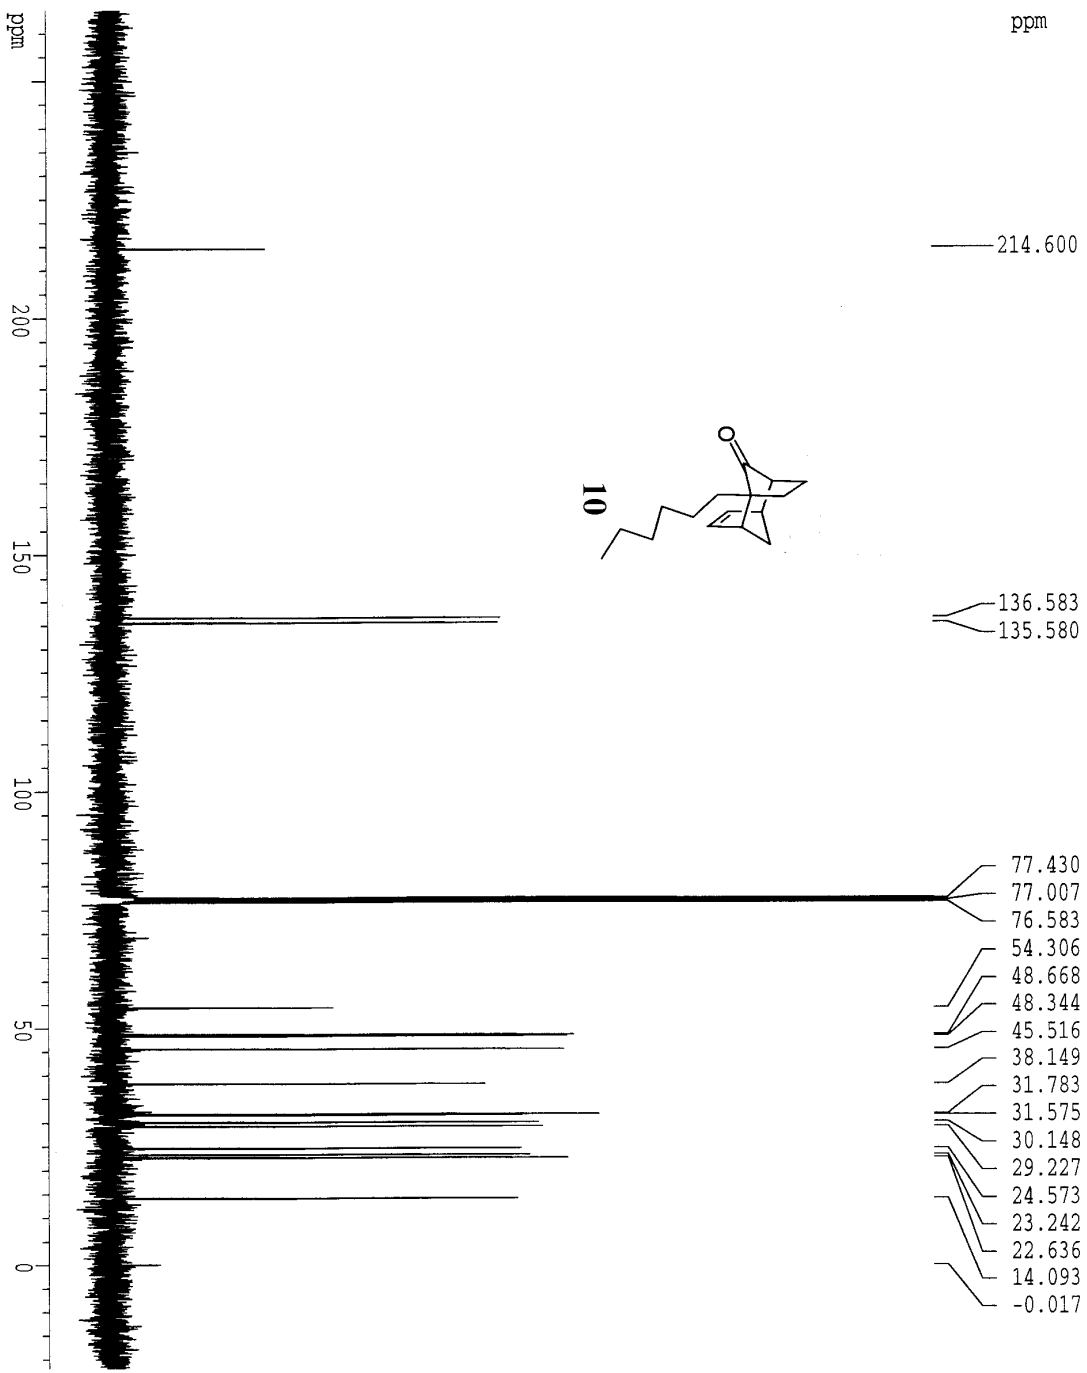

Current Data Parameters  
 NAME SW-IT-67-A3  
 EXPNO 1  
 PROCNO 2

F2 - Acquisition Parameters  
 Date\_ 20010115  
 Time 16.28  
 INSTRUM dirx300  
 PROBHD 5 mm BBO BB-1H  
 PULPROG zgdc30  
 TD 65536  
 SOLVENT CDC13  
 NS 767  
 DS 4  
 SWH 21645.021 Hz  
 FIDRES 0.330277 Hz  
 AQ 1.5139316 sec  
 RG 32768  
 DW 23.100 usec  
 DE 6.00 usec  
 TE 300.0 K  
 D11 0.03000000 sec  
 PL12 24.50 dB  
 CPDPRG2 waltz16  
 PCPD2 100.00 usec  
 SFO2 300.1315007 MHz  
 NUC2 1H  
 PL2 0.00 dB  
 D1 1.00000000 sec  
 P1 7.75 usec  
 DE 6.00 usec  
 SFO1 75.4769164 MHz  
 NUC1 13C  
 PL1 6.00 dB

F2 - Processing parameters  
 SI 32768  
 SF 75.4677498 MHz  
 WDM EM  
 SSB 0  
 LB 1.00 Hz  
 GB 0  
 PC 1.40

1D NMR plot parameters  
 CX 20.00 cm  
 CY 20.00 cm  
 F1P 264.870 ppm  
 F1 19989.14 Hz  
 F2P -21.942 ppm  
 F2 -1655.88 Hz  
 DPVCM 14.34058 ppm/cm  
 HZCM 1082.25110 Hz/cm



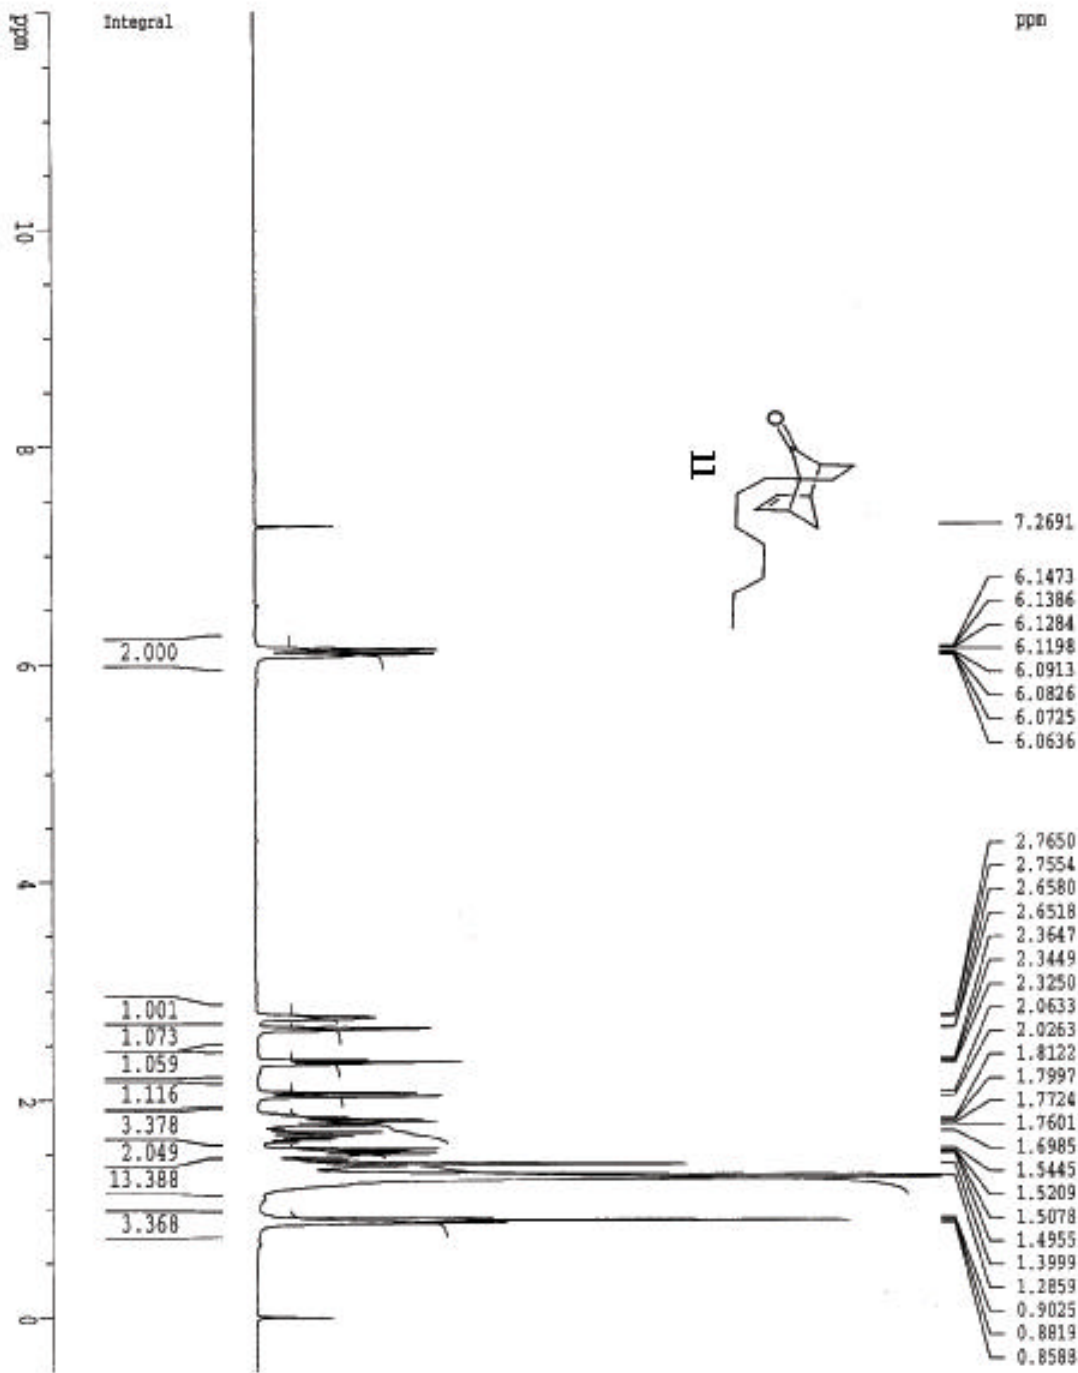

Current Data Parameters  
 NAME sw-II-117-A2  
 EXPRNO 1  
 PROCNO 1

F2 - Acquisition Parameters  
 Date\_ 20011229  
 Time 16.56  
 INSTRUM drx300  
 PROBNM 5 mm BBO BB-1H  
 PULPROG zg30  
 TD 32768  
 SOLC/SMT CDC13  
 NS 16  
 DS 2

SMF 6172.839 Hz  
 FIDRES 0.188380 Hz  
 AQ 2.6542580 sec  
 RG 256  
 DW 81.000 usec  
 DE 6.00 usec  
 TE 300.0 K

DL 1.00000000 sec  
 PL 7.50 usec  
 DE 6.00 usec  
 SFO1 300.1317708 MHz  
 PROC1 1H  
 P11 0.00 dB

F2 - Processing parameters  
 SI 16384  
 SF 300.1306034 MHz  
 WDM KM  
 SSB 0  
 LB 0.30 Hz  
 GB 0  
 PC 1.50

ID NAME plot parameters  
 CX 20.00 cm  
 CY 12.50 cm  
 F1P 12.000 ppm  
 F1 3601.56 Hz  
 F2P -0.500 ppm  
 F2 -150.07 Hz  
 PPM2CN 0.62500 ppm/cm  
 HZCN 387.58125 Hz/cm

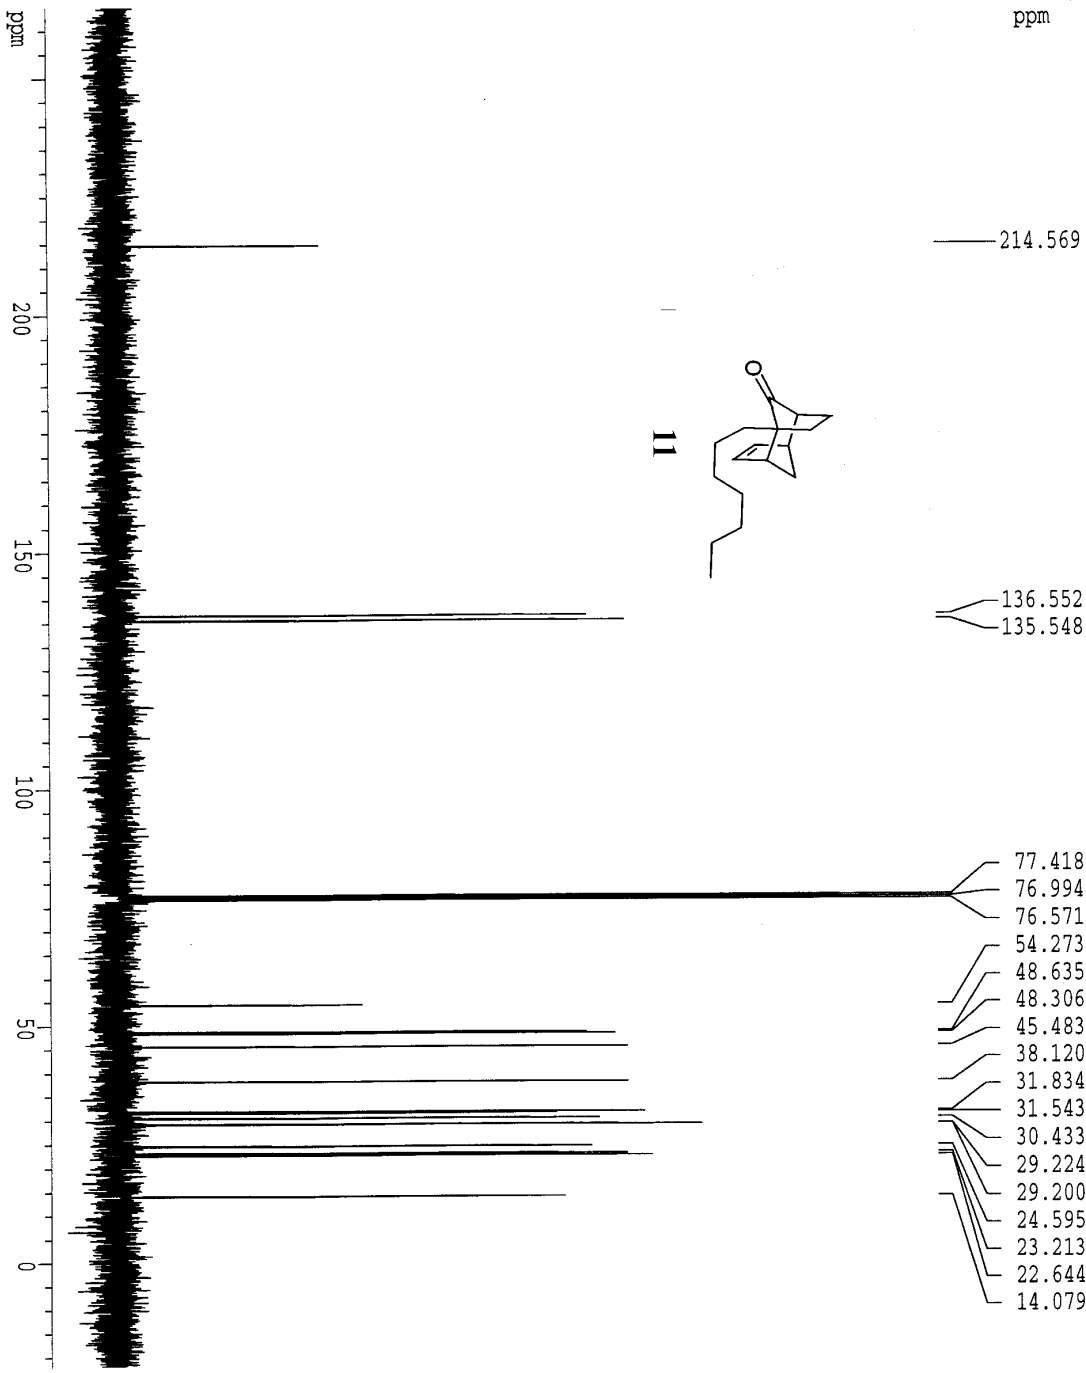

Current Data Parameters  
 NAME sw-11-117-A2  
 EXPNO 2  
 PROCNO 1

F2 - Acquisition Parameters  
 Date\_ 20011229  
 Time 16.38

INSTRUM dx300  
 PROBHD 5 mm BBO BB-1H  
 PULPROG zgpg30  
 TD 65536  
 SOLVENT CDCl3  
 NS 166  
 DS 4

SMH 21645.021 Hz  
 FIDRES 0.330277 Hz  
 AQ 1.5139316 sec  
 RG 32768  
 DM 23.100 usec  
 DE 6.00 usec  
 TE 300.0 K  
 D1 0.03000000 sec  
 D11 24.50 dB  
 PL12

CPDPRG2 waltz16  
 PCPD2 100.00 usec  
 SFO2 300.1315007 MHz  
 NUC2 1H  
 PL2 0.00 dB  
 DI 1.00000000 sec  
 P1 7.75 usec  
 DE 6.00 usec  
 SFO1 75.4769164 MHz  
 NUC1 13C  
 PL1 6.00 dB

F2 - Processing parameters  
 SI 32768  
 SF 75.4677518 MHz  
 WDM EM  
 SSB 0  
 LB 1.00 Hz  
 GB 0  
 PC 1.40

ID NMR plot parameters  
 CX 20.00 cm  
 CY 12.50 cm  
 F1P 264.844 ppm  
 F1 19987.16 Hz  
 F2P -21.968 ppm  
 F2 -1657.86 Hz  
 PPMCM 14.34058 ppm/cm  
 HZCM 1082.25098 Hz/cm

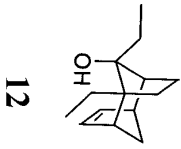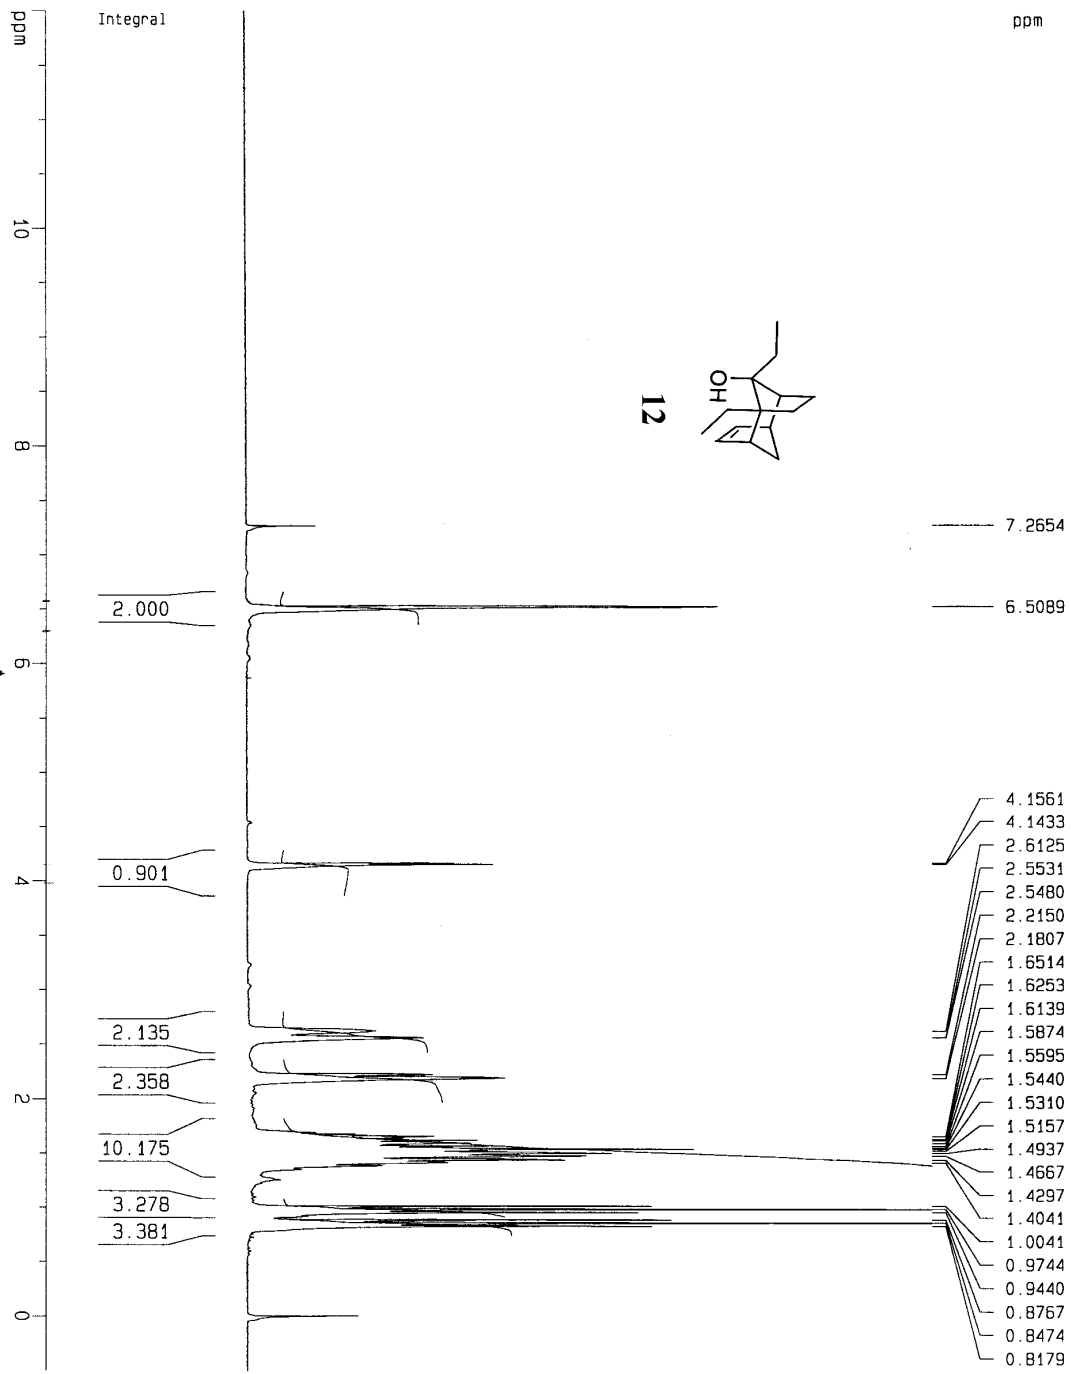

Current Data Parameters  
 NAME sw-111-36-A1  
 EXPNO 1  
 PROCNO 2

F2 - Acquisition Parameters  
 Date\_ 20020308  
 Time 13.33  
 INSTRUM arx250  
 PROBHD 5 mm QNP 1H  
 PULPROG zg30  
 TD 32768  
 SOLVENT CDCl3  
 NS 16  
 DS 2  
 SMH 5208.333 Hz  
 FIDRES 0.158946 Hz  
 AQ 3.1457779 sec  
 RG 715  
 DW 96.000 use  
 DE 137.14 use  
 TE 300.0 K  
 D1 1.0000000 sec  
 P1 8.70 use  
 SF01 250.1315321 MHz  
 NUCLEUS 1H

F2 - Processing parameters  
 SI 16384  
 SF 250.1300065 MHz  
 MDW EM  
 SSB 0  
 LB 0.20 Hz  
 GB 0  
 PC 1.50

1D NMR plot parameters  
 CX 20.00 cm  
 CY 12.50 cm  
 F1P 12.000 ppm  
 F1 3001.56 Hz  
 F2P -0.500 ppm  
 F2 -125.07 Hz  
 PPMCM 0.62500 ppm  
 HZCM 156.33125 Hz/

Current Data Parameters

NAME sw-III-36-A1  
 EXPNO 2  
 PROCNO 2

F2 - Acquisition Parameters

Date\_ 20020308  
 Time 13.35  
 INSTRUM srx250  
 PROBHD 5 mm QNP 1H  
 PULPROG zgpg30  
 TD 36864  
 SOLVENT CDCl3  
 NS 106  
 DS 4  
 SMH 17241.379 Hz  
 FIDRES 0.467702 Hz  
 AQ 1.0691060 sec  
 RG 22800  
 DM 29.000 use  
 DE 41.43 use  
 TE 300.0 K  
 D12 0.0002000 sec  
 DL5 23.00 dB  
 CPDPRG waltz16  
 P31 103.00 use  
 D1 1.00000000 sec  
 P1 5.35 use  
 SF01 62.9023694 MHz  
 NUCLEUS 13C  
 D11 0.03000000 sec

F2 - Processing parameters

SF 62.8952408 MHz  
 MDW EM  
 SSB 0  
 LB 1.00 Hz  
 GB 0  
 PC 1.40

1D NMR plot parameters

CX 20.00 cm  
 CY 10.00 cm  
 F1P 250.405 ppm  
 F1 15749.28 Hz  
 F2P -23.724 ppm  
 F2 -1492.10 Hz  
 PPKCM 13.70643 ppm  
 HZCM 862.06891 Hz/

- 141.524
- 140.999
- 86.083
- 77.508
- 76.999
- 76.492
- 51.594
- 47.620
- 44.596
- 44.495
- 41.874
- 36.151
- 29.710
- 27.387
- 24.893
- 9.595
- 7.382

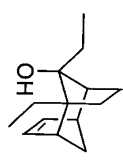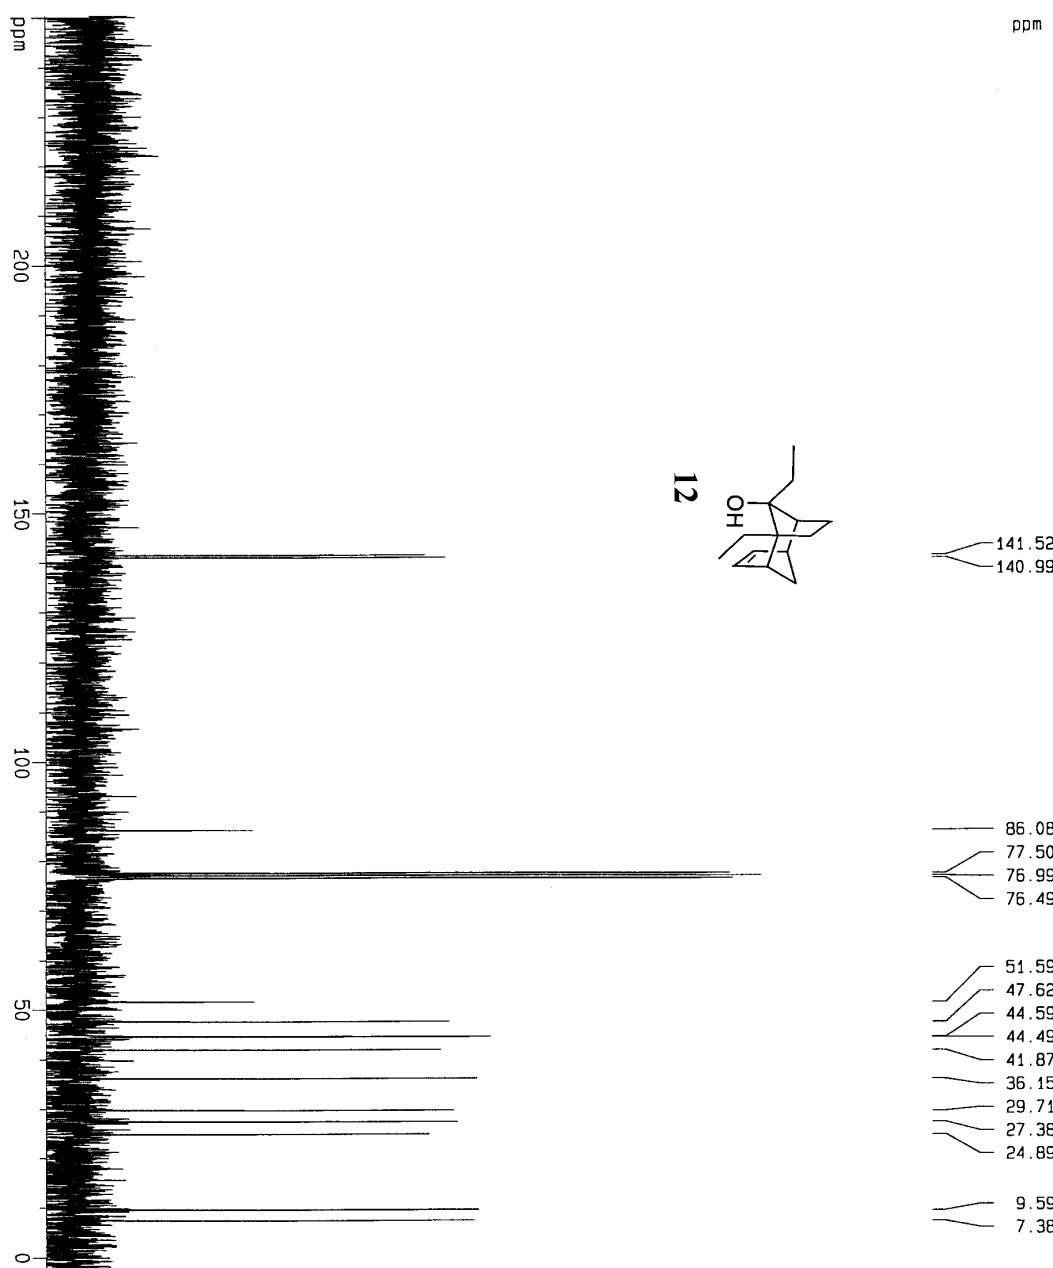

13

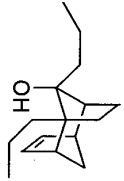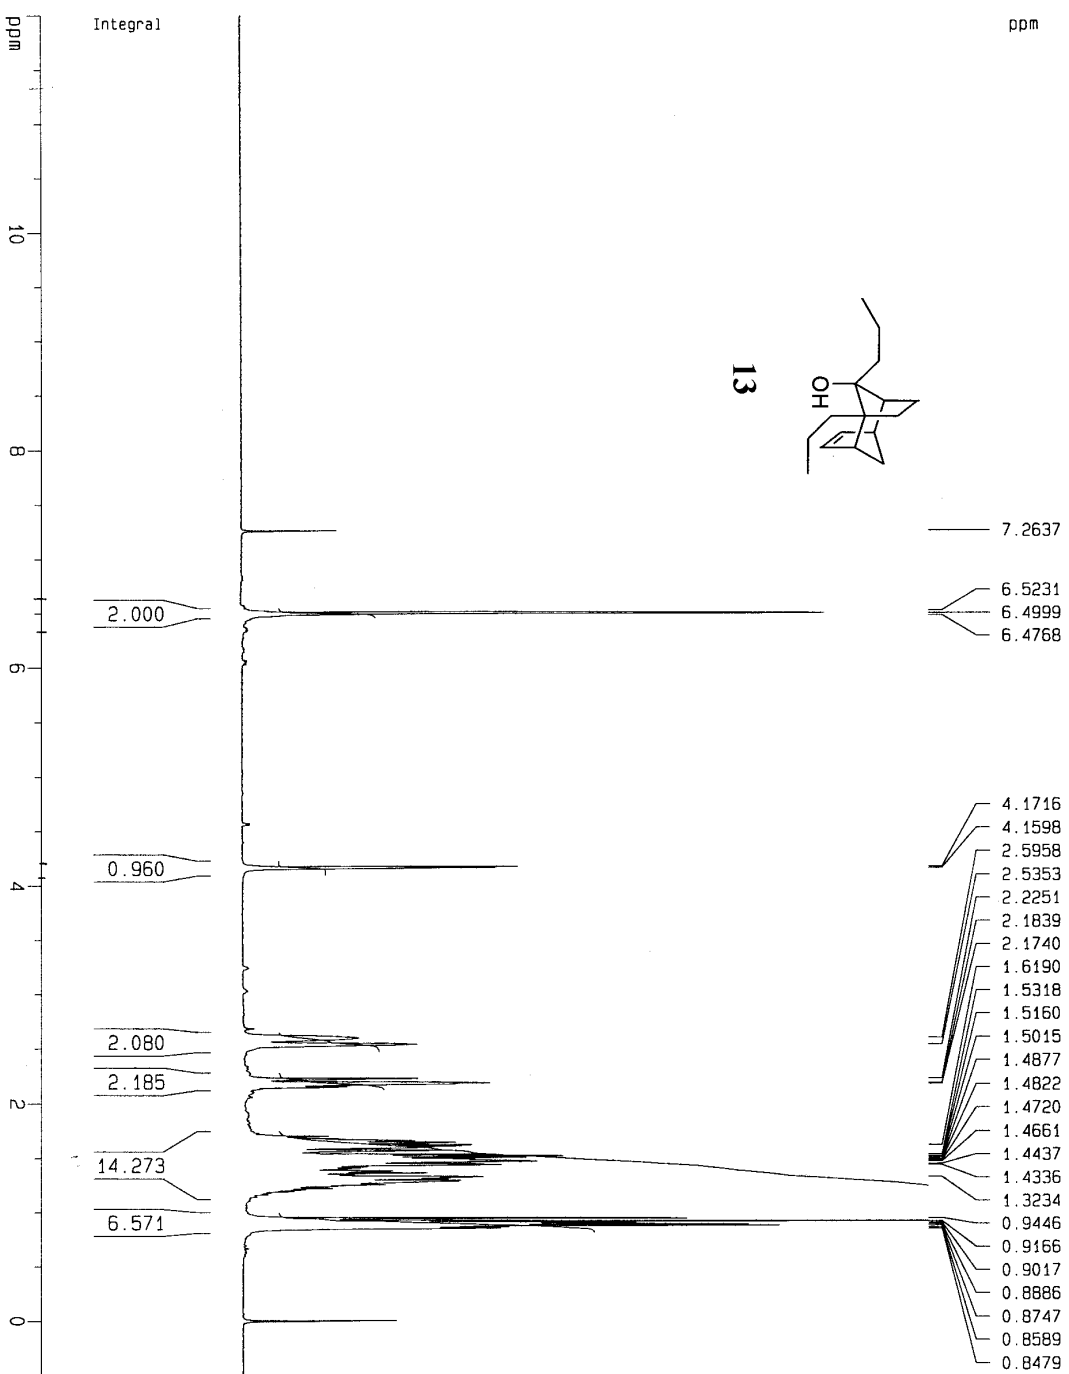

Current Data Parameters  
 NAME Sw-III-34-A1  
 EXPNO 1  
 PROCNO 1

F2 - Acquisition Parameters

Date\_ 20020306  
 Time 16.18  
 INSTRUM arx250  
 PROBHD 5 mm GNP 1H  
 PULPROG zg30  
 TD 32768  
 SOLVENT CDCl3  
 NS 16  
 DS 2  
 SMH 5208.333 Hz  
 FIDRES 0.158946 Hz  
 AQ 3.1457779 sec  
 RG 715  
 DE 96.000 use  
 TE 137.14 use  
 D1 300.0 K  
 D1 1.00000000 sec  
 P1 8.70 use  
 SF01 250.1315321 MHz  
 NUCLEUS 1H

F2 - Processing parameters

SI 16384  
 SF 250.1300062 MHz  
 MDW EM  
 SSB 0  
 LB 0.20 Hz  
 GB 0  
 PC 1.50

1D NMR plot parameters

CX 20.00 cm  
 CY 12.50 cm  
 F1P 12.000 ppm  
 F1 3001.56 Hz  
 F2P -0.500 ppm  
 F2 -125.07 Hz  
 PPMCM 0.62500 ppm  
 HZCM 156.33125 Hz

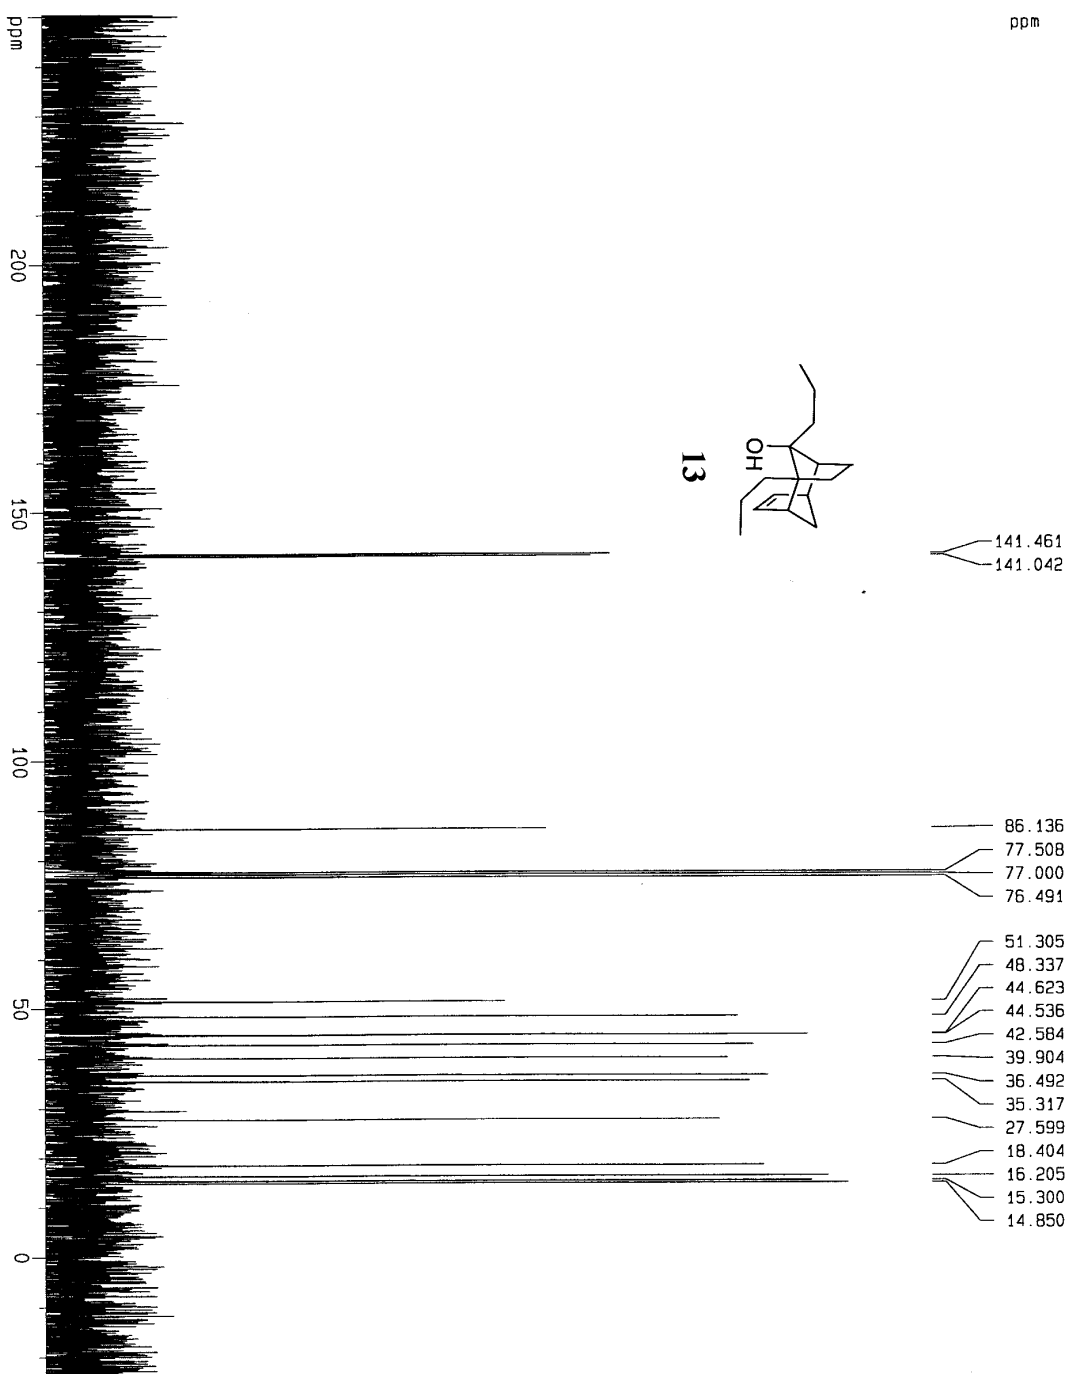

Current Data Parameters  
 NAME sw-III-34-A1  
 EXPNO 2  
 PROCNO 1

F2 - Acquisition Parameters

Date\_ 20020306  
 Time 16.21  
 INSTRUM arx250  
 PROBHD 5 mm QNP 1H  
 PULPROG zgpg30  
 TD 36864  
 SOLVENT CDCl3  
 NS 111  
 DS 4  
 SMH 17241.379 Hz  
 FIDRES 0.467702 Hz  
 AQ 1.0691060 sec  
 RG 22800  
 DW 29.000 use  
 DE 41.43 use  
 TE 300.0 K  
 D12 0.00002000 sec  
 DL5 23.00 dB  
 CPOPRG Waltz16  
 P31 103.00 use  
 D1 1.00000000 sec  
 P1 5.35 use  
 SF01 62.9023694 MHz  
 NUCLEUS 13C  
 D11 0.03000000 sec

F2 - Processing parameters

SI 32768  
 SF 62.8952408 MHz  
 MDW EM  
 SSB 0  
 LB 1.00 Hz  
 GB 0  
 PC 1.40

1D NMR plot parameters

CX 20.00 cm  
 CY 20.00 cm  
 F1P 250.405 ppm  
 F1 15749.28 Hz  
 F2P -23.724 ppm  
 F2 -1492.10 Hz  
 PPMCM 13.70643 ppm  
 HZCM 862.06991 Hz/

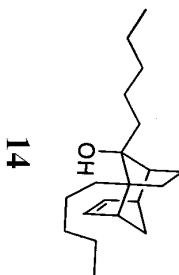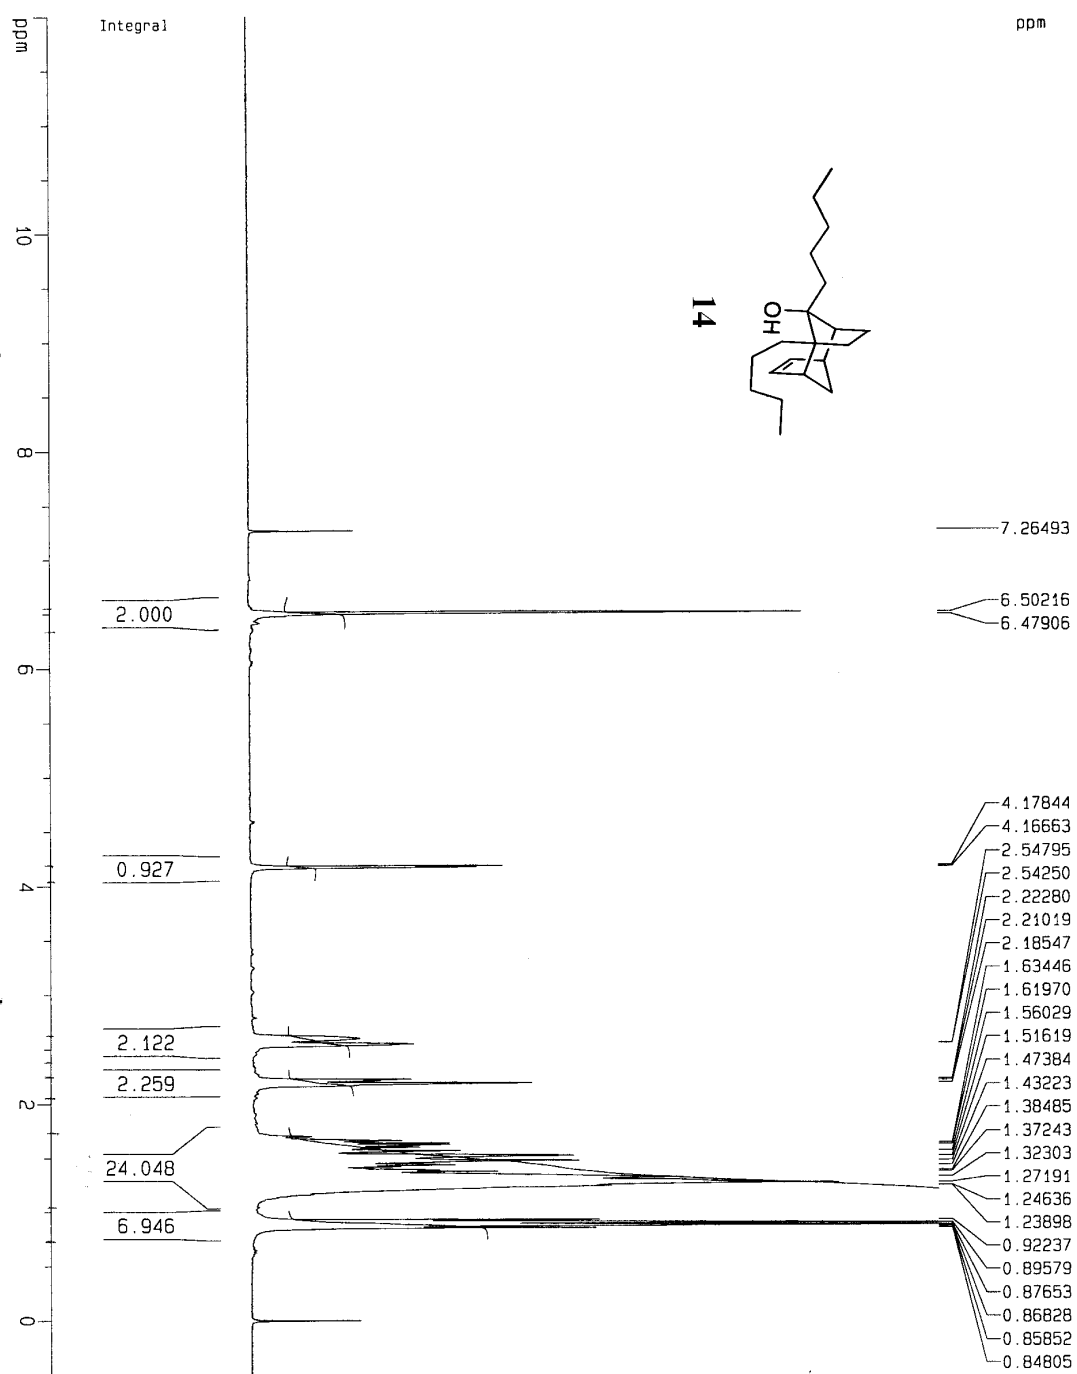

Current Data Parameters  
 NAME SW-III-32-A1  
 EXPNO 1  
 PROCNO 1

F2 - Acquisition Parameters  
 Date\_ 20020305  
 Time 13.33  
 INSTRUM apr250  
 PROBHD 5 mm GNP 1H  
 PULPROG zg30  
 TD 32768  
 SOLVENT CDCl3  
 NS 16  
 DS 2  
 SMH 5208.333 Hz  
 FIDRES 0.158946 Hz  
 AQ 3.1457779 sec  
 RG 512  
 DM 96.000 use  
 DE 137.14 use  
 TE 300.0 K  
 D1 1.00000000 sec  
 P1 8.70 use  
 SF01 250.1315321 MHz  
 NUCLEUS 1H

F2 - Processing parameters  
 SI 16384  
 SF 250.1300062 MHz  
 WDM EM  
 SSB 0  
 LB 0.20 Hz  
 GB 0  
 PC 1.50

1D NMR plot parameters  
 CX 20.00 cm  
 CY 12.50 cm  
 F1P 12.000 ppm  
 F1 3001.56 Hz  
 F2P -0.500 ppm  
 F2 -125.07 Hz  
 PPMCM 0.62500 ppm  
 HZCM 156.33125 Hz/

Current Data Parameters  
 NAME sw-III-32-A1  
 EXPNO 2  
 PROCNO 1

F2 - Acquisition Parameters  
 Date\_ 20020305  
 Time 13.36  
 INSTRUM arx250  
 PROBHD 5 mm QNP 1H  
 PULPROG zgpg30  
 TD 36864  
 SOLVENT CDCl3  
 NS 138  
 DS 4

SMH 17241.379 Hz  
 FIDRES 0.467702 Hz  
 AQ 1.0691060 sec  
 RG 22800  
 DM 29.000 use  
 DE 41.43 use  
 TE 300.0 K  
 D12 0.00002000 sec  
 DL5 23.00 dB  
 CPDPRG Waitz16  
 P31 103.00 use  
 D1 1.00000000 sec  
 P1 5.35 use  
 SF01 62.9023694 MHz  
 NUCLEUS 13C  
 D11 0.03000000 sec

F2 - Processing parameters  
 SI 32768  
 SF 62.8952408 MHz  
 MDM EM  
 SSB 0  
 LB 1.00 Hz  
 GB 0  
 PC 1.40

1D NMR plot parameters  
 CX 20.00 cm  
 CY 10.00 cm  
 F1P 250.405 ppm  
 F1 15749.28 Hz  
 F2P -23.724 ppm  
 F2 -1492.10 Hz  
 PPMICM 13.70643 ppm  
 HZCM 862.06891 Hz/

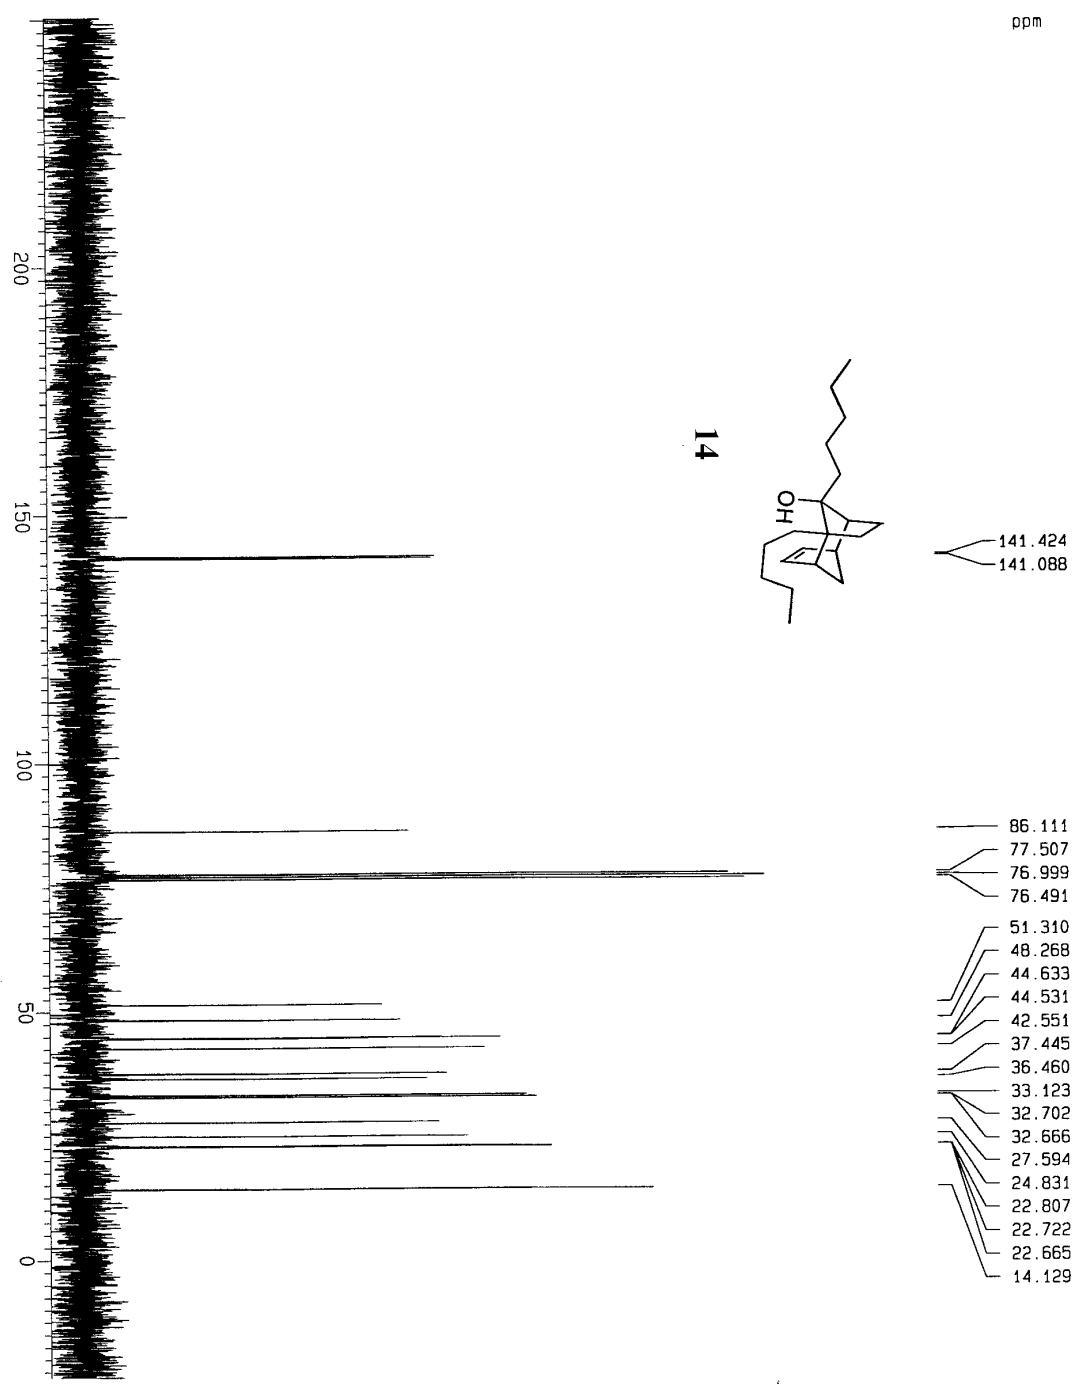



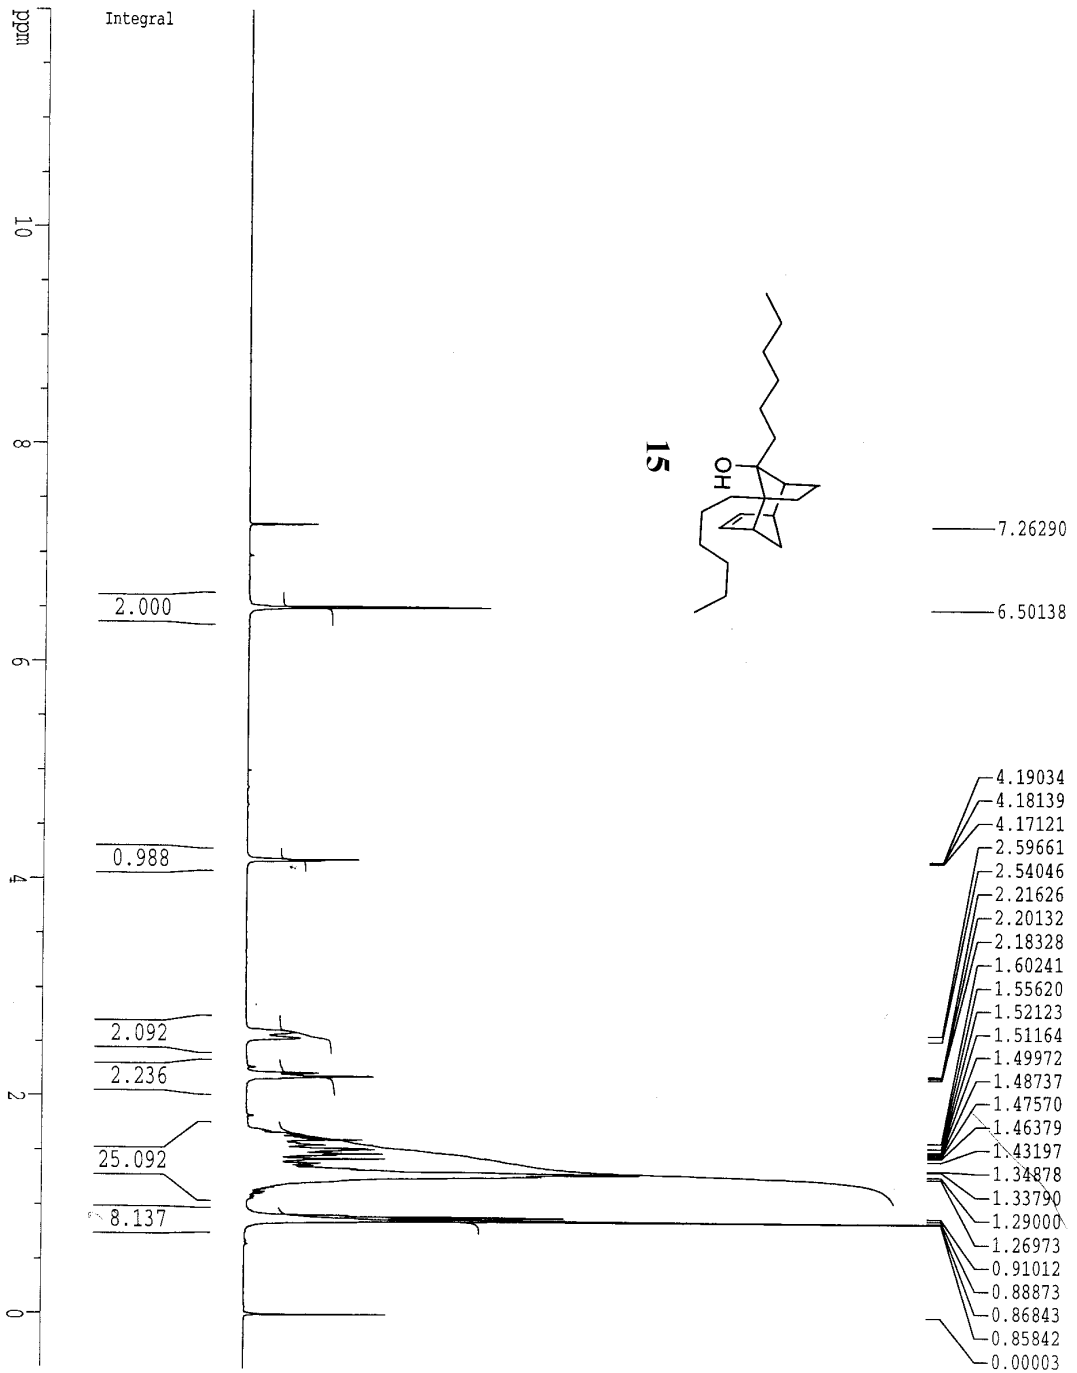

15

Current Data Parameters  
 NAME sw-II-67-A1  
 EXPNO 1  
 PROCNO 1

F2 - Acquisition Parameters  
 Date\_ 20011015  
 Time 16.04  
 INSTRUM dtx300  
 PROBHD 5 mm BBO BB-1H  
 PULPROG zg30  
 TD 32768  
 SOLVENT CDCl3  
 NS 16  
 DS 2

SMH 6172.839 Hz  
 FIDRES 0.188380 Hz  
 AQ 2.6542580 sec  
 RG 128  
 DM 81.000 usec  
 DE 6.00 usec  
 TE 300.0 K  
 D1 1.00000000 sec  
 P1 7.50 usec  
 DE 6.00 usec  
 SFO1 300.1317708 MHz  
 NUQC1 1H  
 PL1 0.00 dB

F2 - Processing parameters  
 SI 16384  
 SF 300.1300053 MHz  
 WDM EM  
 SSB 0  
 LB 0.30 Hz  
 GB 0  
 PC 1.50

1D NMR plot parameters  
 CX 20.00 cm  
 CY 12.50 cm  
 FIP 12.000 ppm  
 F1 3601.56 Hz  
 F2P -0.500 ppm  
 F2 -150.07 Hz  
 PPMCM 0.62500 ppm/cm  
 HZCM 187.58125 Hz/cm

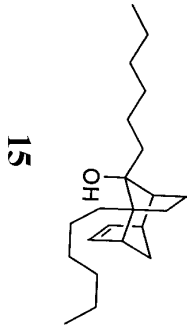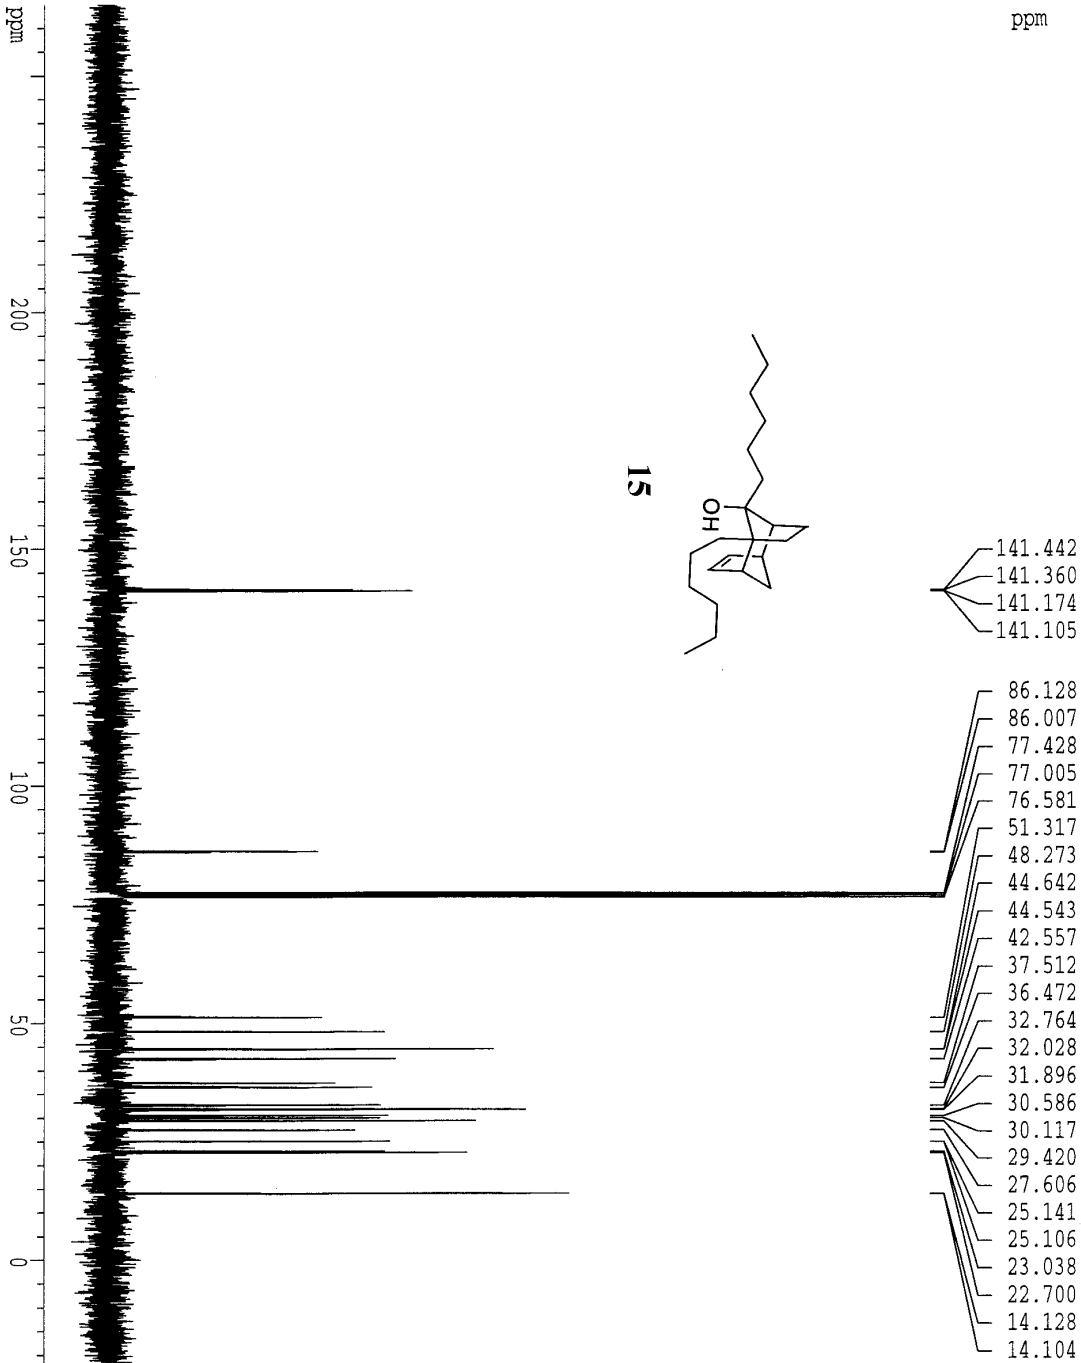

Current Data Parameters  
 NAME sw-II-67-A1  
 EXPNO 2  
 PROCNO 1

F2 - Acquisition Parameters  
 Date\_ 20011015  
 Time 16.07

INSTRUM dx300  
 PROBHD 5 mm BBO BB-1H  
 PULPROG zgpg30

TD 65536  
 SOLVENT CDCl3  
 NS 278

DS 4  
 SWH 21645.021 Hz  
 FIDRES 0.330277 Hz

AQ 1.5139316 sec  
 RG 32768  
 DW 23.100 usec

DE 6.00 usec  
 TE 300.0 K  
 D11 0.03000000 sec

PL12 24.50 dB  
 CPDPRG2 waltz16  
 PCPD2 100.00 usec

SFO2 300.1315007 MHz  
 NUC2 1H  
 PL2 0.00 dB

D1 1.00000000 sec  
 P1 7.75 usec  
 DE 6.00 usec

SFO1 75.4769164 MHz  
 NUC1 13C  
 PL1 6.00 dB

F2 - Processing parameters  
 SI 32768  
 SF 75.4677498 MHz

WDW EM  
 SSB 0  
 LB 1.00 Hz

GB 0  
 PC 1.40

1D NMR plot parameters  
 CX 20.00 cm  
 CY 12.50 cm

F1P 264.870 ppm  
 F1 19989.14 Hz  
 F2P -21.942 ppm

F2 -1655.88 Hz  
 PPRCM 14.34058 ppm/cm  
 HZCM 1082.25110 Hz/cm

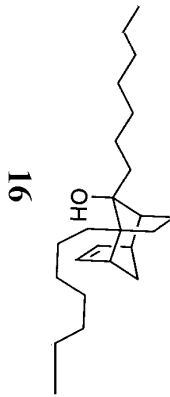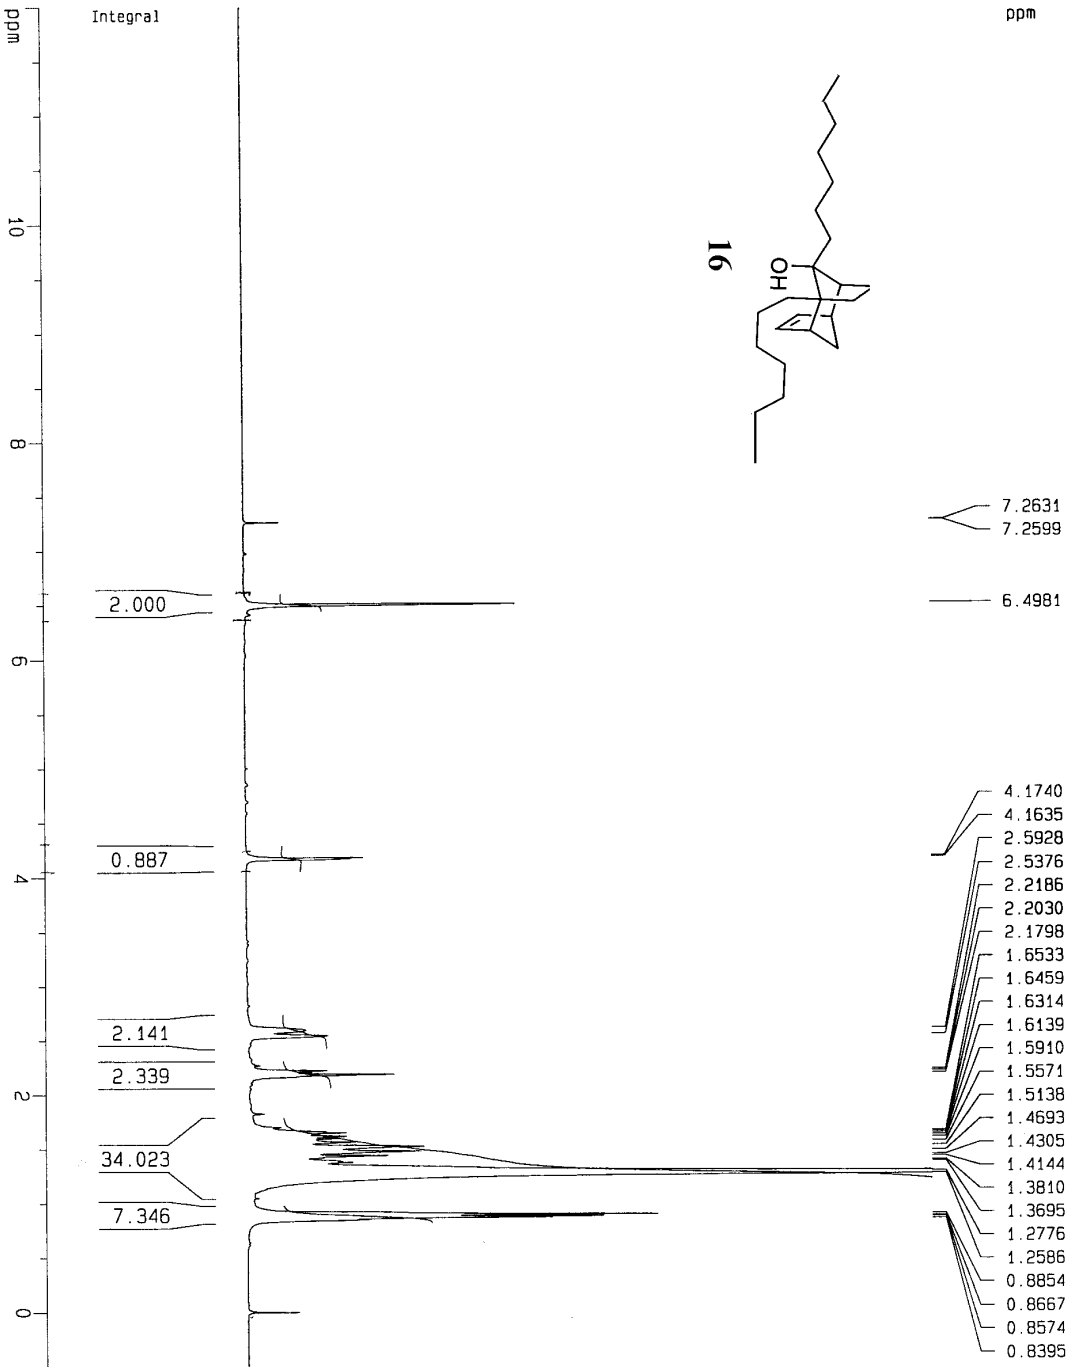

Current Data Parameters  
 NAME sw-III-38-A1  
 EXPNO 1  
 PROCNO 2

F2 - Acquisition Parameters

Date\_ 20020308  
 Time 13.43  
 INSTRUM arx250  
 PROBHD 5 mm QNP 1H  
 PULPROG zg30  
 TD 32768  
 SOLVENT CDCl3  
 NS 16  
 DS 2  
 SMH 5208.333 Hz  
 FIDRES 0.158946 Hz  
 AQ 3.1457779 sec  
 RG 256  
 DM 96.000 use  
 DE 137.14 use  
 TE 300.0 K  
 D1 1.00000000 sec  
 P1 8.70 use  
 SF01 250.1315321 MHz  
 NUCLEUS 1H

F2 - Processing parameters

SI 16384  
 SF 250.130066 MHz  
 WDW EM  
 SSB 0  
 LB 0.20 Hz  
 GB 0  
 PC 1.50

1D NMR plot parameters

CX 20.00 cm  
 CY 12.50 cm  
 F1P 12.000 ppm  
 F1 3001.56 Hz  
 F2P -0.500 ppm  
 F2 -125.07 Hz  
 PPKCM 0.62500 ppm  
 HZCM 156.33125 Hz/

16

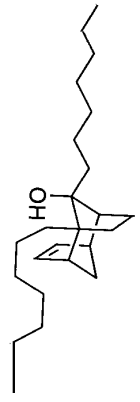

141.428  
141.073

86.112  
77.508  
76.999  
76.491  
51.309  
48.280  
44.634  
44.530  
42.556  
37.507  
36.470  
32.763  
31.945  
31.916  
30.886  
30.407  
29.472  
29.331  
27.598  
25.178  
23.073  
22.681  
14.096

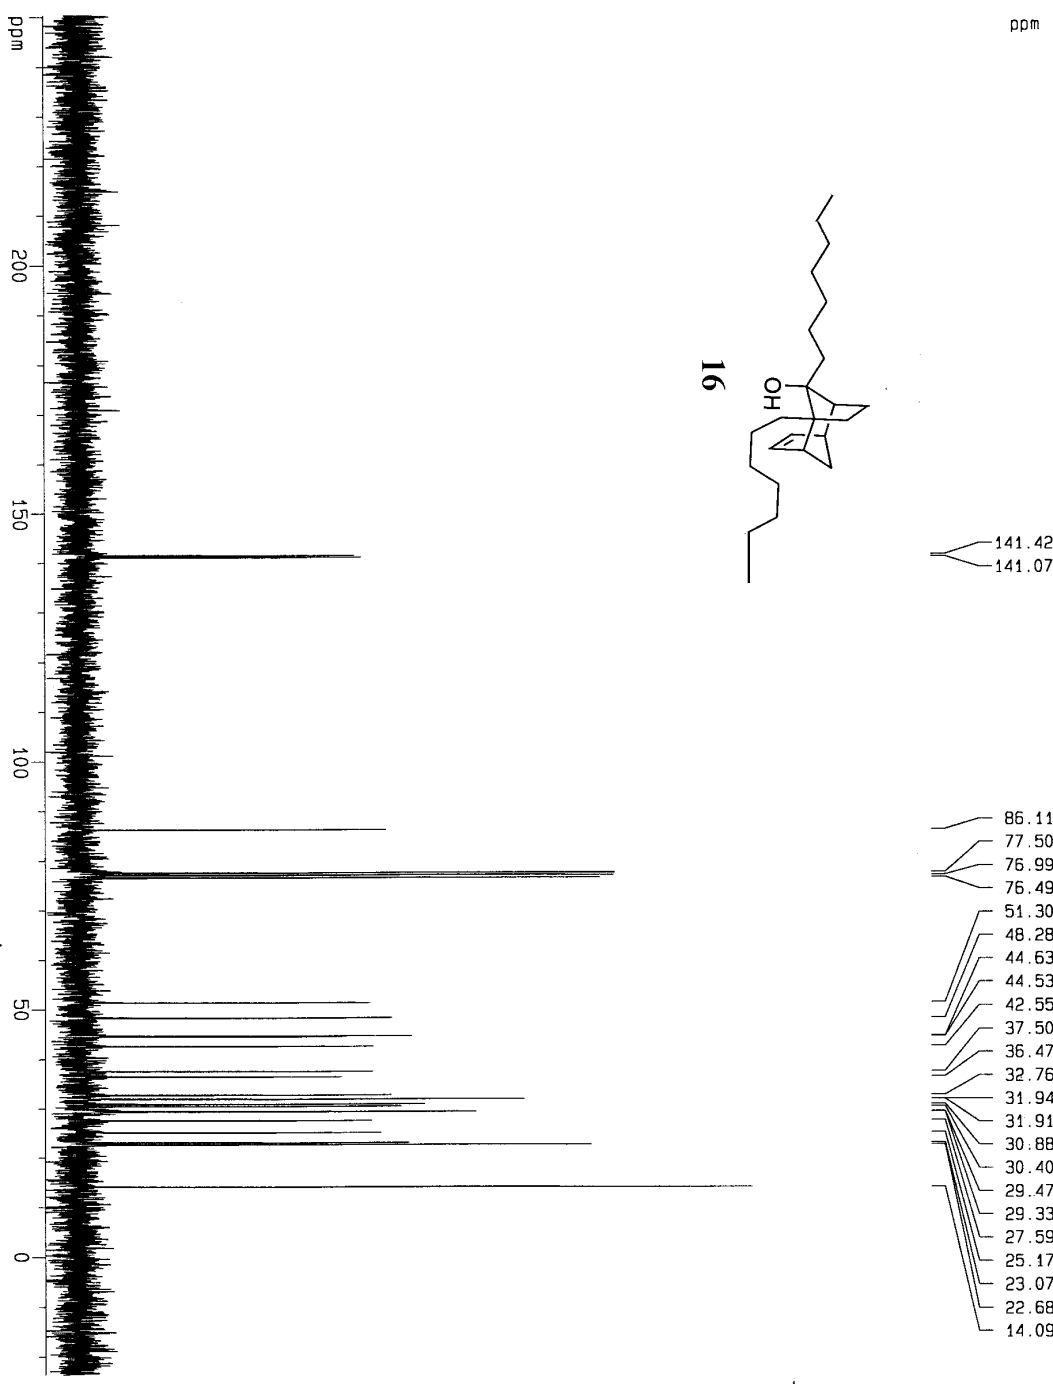

Current Data Parameters  
NAME sw-111-38-A1  
EXPNO 2  
PROCNO 2

F2 - Acquisition Parameters  
Date\_ 20020308  
Time 13.45  
INSTRUM srx250  
PROBHD 5 mm QNP 1H  
PULPROG zgpg30  
TD 36864  
SOLVENT CDCl3  
NS 223  
DS 4  
SWH 17241.379 Hz  
FIDRES 0.467702 Hz  
AQ 1.0691060 sec  
RG 22800  
DM 29.000 use  
DE 41.43 use  
TE 300.0 K  
D12 0.00002000 sec  
DL5 23.00 dB  
CPDPRG waliz16  
P31 103.00 use  
D1 1.00000000 sec  
P1 5.35 use  
SF01 62.9023694 MHz  
NUCLEUS 13C  
D11 0.03000000 sec

F2 - Processing parameters  
SI 32768  
SF 62.8952408 MHz  
WDW EM  
SSB 0  
LB 1.00 Hz  
GB 0  
PC 1.40

1D NMR plot parameters  
CX 20.00 cm  
CY 10.00 cm  
F1P 250.405 ppm  
F1 15749.28 Hz  
F2P -23.724 ppm  
F2 -1492.10 Hz  
PPKCK 13.70643 ppm  
HZCM 862.06891 Hz/

Current Data Parameters  
 NAME SW-VI-76-A1A  
 EXPNO 3  
 PROCNO 1

F2 - Acquisition Parameters  
 Date\_ 20030604  
 Time 22.08

INSTRUM arx250  
 PROBHD 5 mm QNP 1H  
 PULPROG zg30  
 TD 32768  
 SOLVENT CDCl3  
 NS 16  
 DS 2

SMH 5208.333 Hz  
 FIDRES 0.158946 Hz  
 AQ 3.1457779 sec  
 RG 1024

DW 96.000 use  
 DE 137.14 use  
 TE 300.0 K  
 D1 1.0000000 sec  
 P1 8.70 use  
 SF01 250.1315321 MHz  
 NUCLEUS 1H

F2 - Processing parameters  
 SI 16384  
 SF 250.1300049 MHz  
 MDW EM  
 SSB 0  
 LB 0.20 Hz  
 GB 0  
 PC 1.50

1D NMR plot parameters  
 CX 20.00 cm  
 CY 7.00 cm  
 F1P 12.000 ppm  
 F1 3001.56 Hz  
 F2P -0.500 ppm  
 F2 -125.07 Hz  
 PPMCM 0.62500 ppm  
 HZCM 156.33125 Hz/

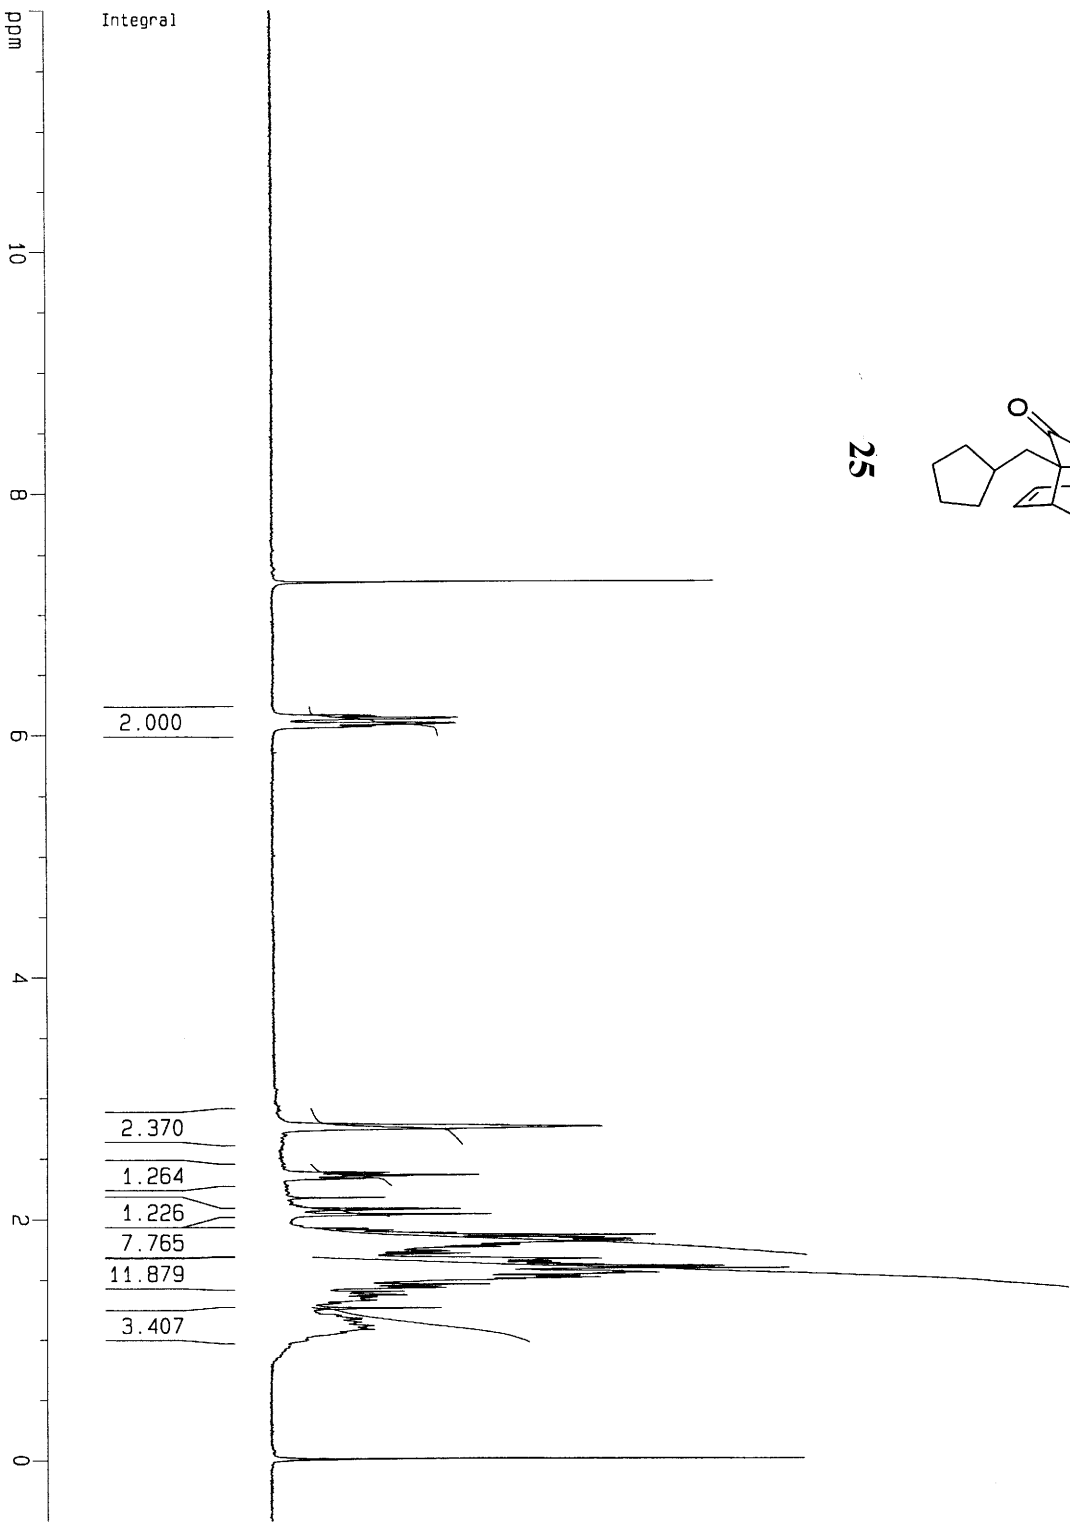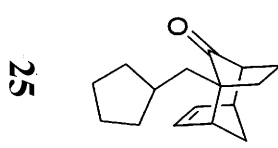

Current Data Parameters  
 NAME SW-VI-76-A1A  
 EXPNO 4  
 PROCNO 1

F2 - Acquisition Parameters  
 Date\_ 20030601  
 Time 22.09

INSTRUM arx250  
 PROBHD 5 mm GNP 1H  
 PULPROG zgpg30  
 TD 36864  
 SOLVENT CDCl3  
 NS 4753  
 DS 4

SMH 17241.379 Hz  
 FIDRES 0.467702 Hz  
 AQ 1.0691060 sec  
 RG 22800  
 DM 29.000 use  
 DE 41.43 use  
 TE 300.0 K

D12 0.0000200 sec  
 DL5 23.00 dB  
 CPDPRG walz16  
 P31 103.00 use  
 D1 1.00000000 sec  
 P1 5.35 use  
 SF01 62.9023694 MHz  
 NUCLEUS 13C  
 D11 0.03000000 sec

F2 - Processing parameters  
 SI 32768  
 SF 62.8952440 MHz  
 MDM EM  
 SSB 0  
 LB 1.00 Hz  
 GB 0  
 PC 3.00

1D NMR plot parameters  
 CX 20.00 cm  
 CY 40.00 cm  
 F1P 250.354 ppm  
 F1 15746.05 Hz  
 F2P -23.775 ppm  
 F2 -1495.33 Hz  
 PPMCM 13.70643 ppm  
 HZCM 862.06897 Hz/

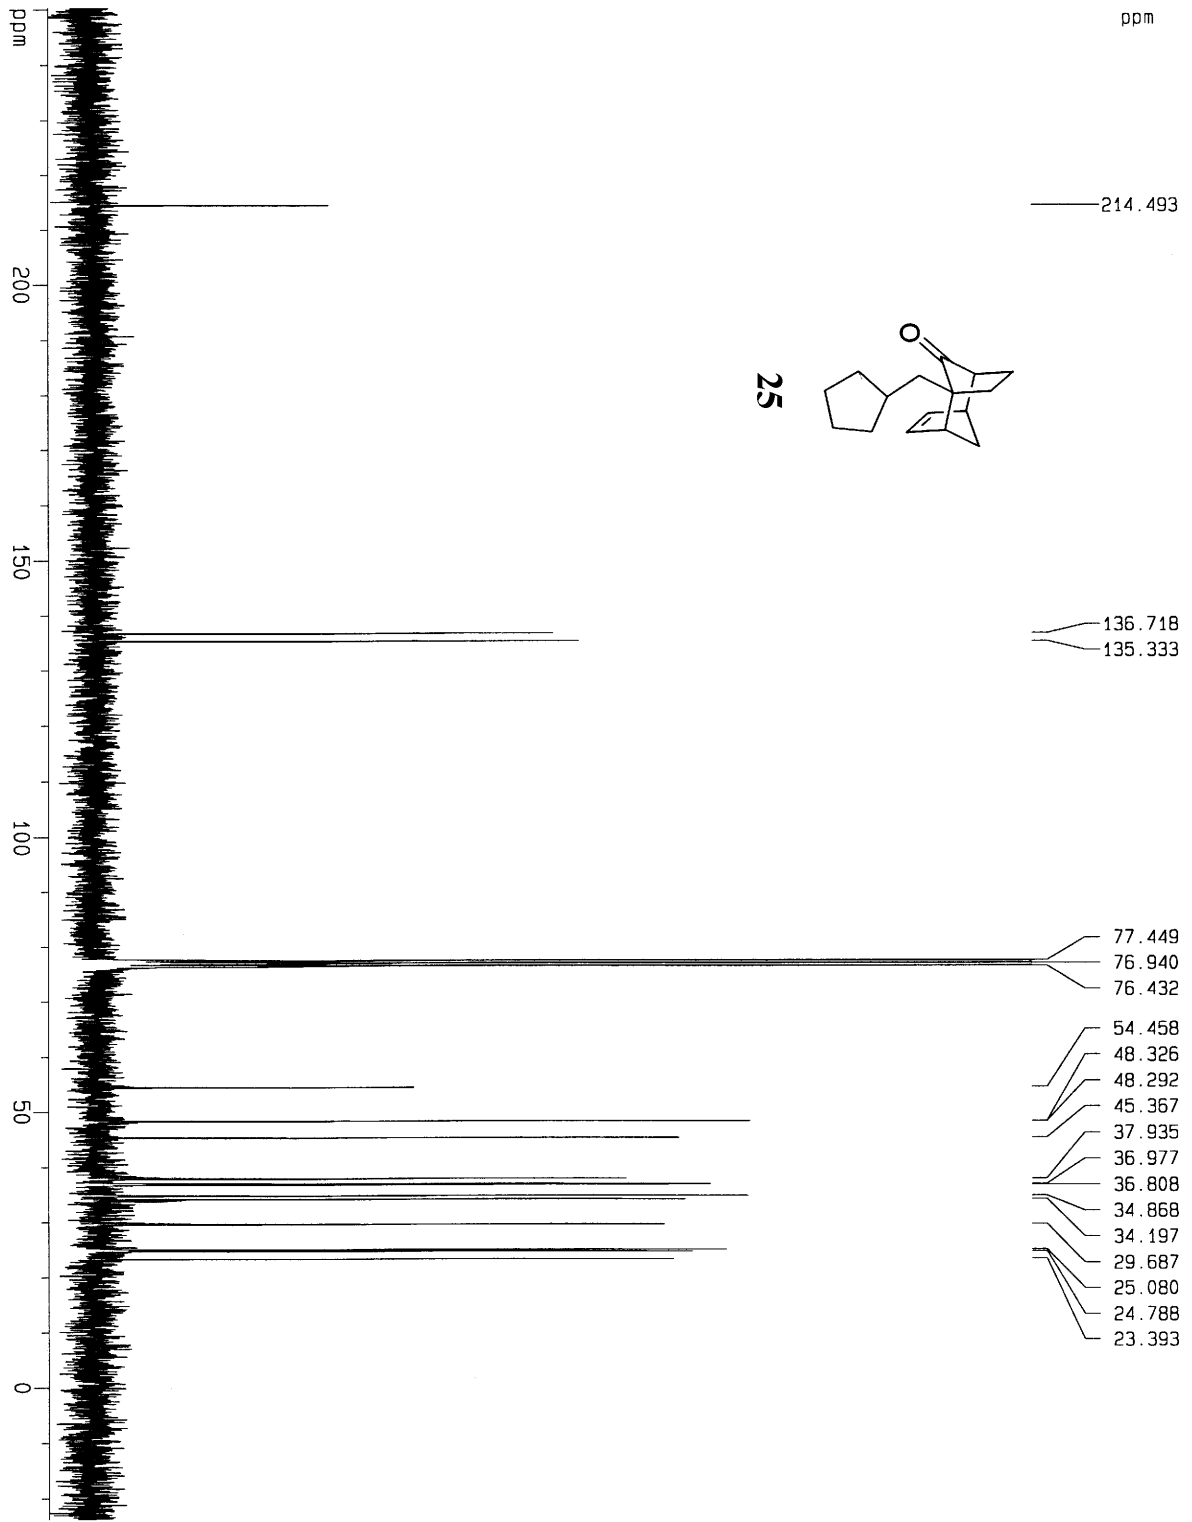

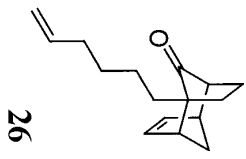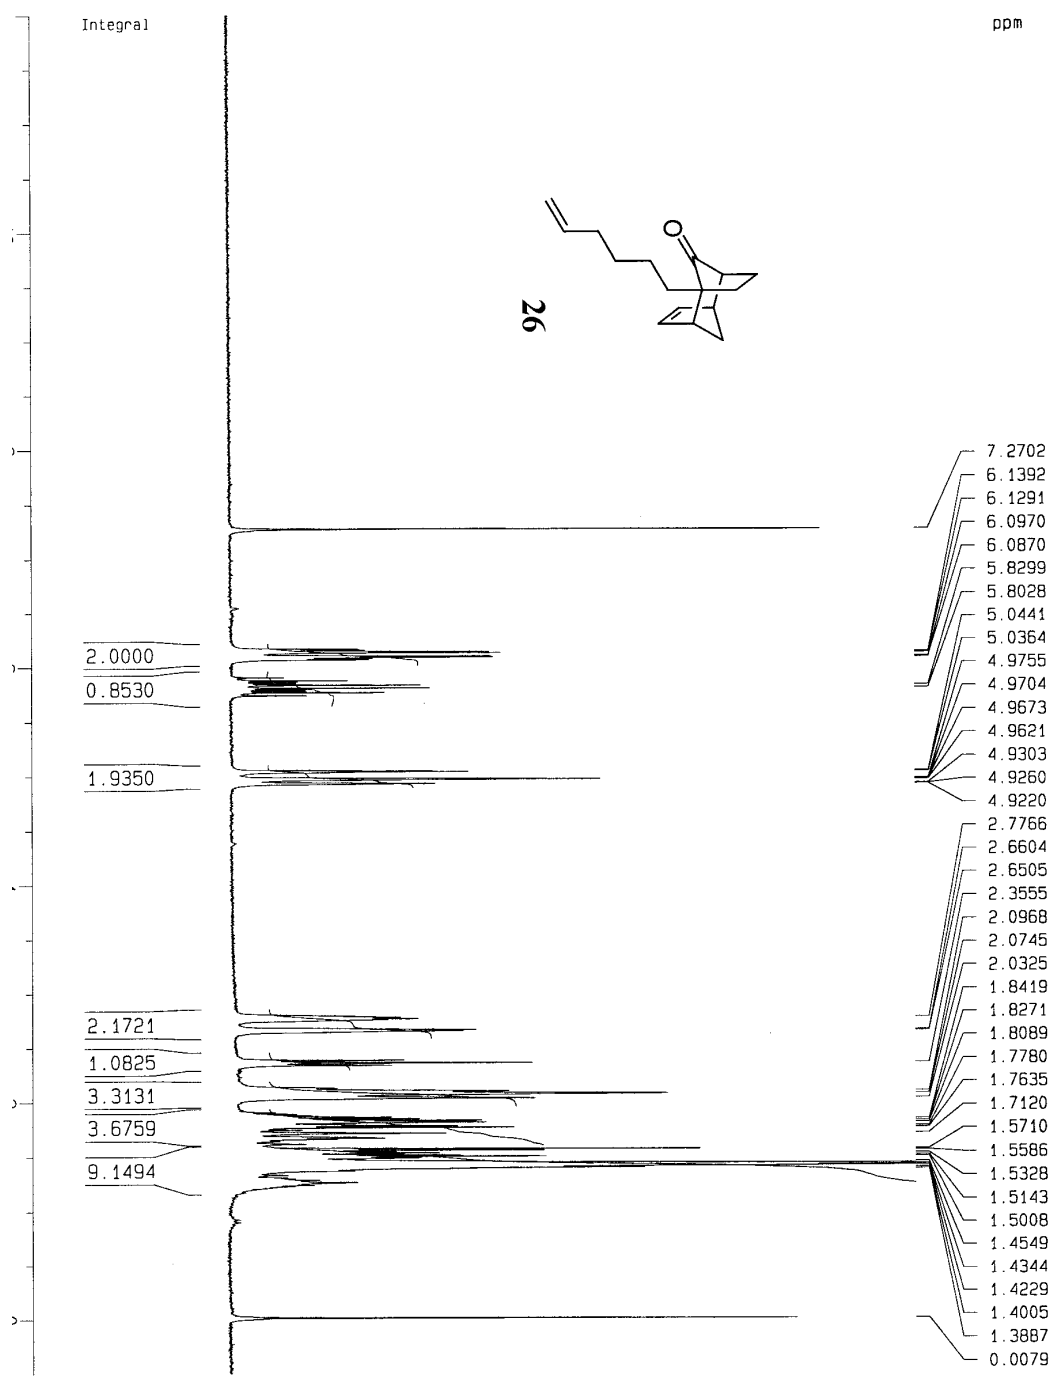

- 7.2702
- 6.1392
- 6.1291
- 6.0970
- 6.0870
- 5.8299
- 5.8028
- 5.0441
- 5.0364
- 4.9755
- 4.9704
- 4.9673
- 4.9621
- 4.9303
- 4.9260
- 4.9220
- 2.7766
- 2.6604
- 2.6505
- 2.3555
- 2.0968
- 2.0745
- 2.0325
- 1.8419
- 1.8271
- 1.8089
- 1.7780
- 1.7635
- 1.7120
- 1.5710
- 1.5586
- 1.5328
- 1.5143
- 1.5008
- 1.4549
- 1.4344
- 1.4229
- 1.4005
- 1.3887
- 0.0079

- 2.0000
- 0.8530
- 1.9350
- 2.1721
- 1.0825
- 3.3131
- 3.6759
- 9.1494

Current Data Parameters  
 NAME SW-IV-64-A1  
 EXPNO 2  
 PROCNO 1

F2 - Acquisition Parameters  
 Date\_ 20021029  
 Time 23.09  
 INSTRUM arx250  
 PROBHD 5 mm QNP 1H  
 PULPROG zg30  
 TD 32768  
 SOLVENT CDCl3  
 NS 16  
 DS 2  
 SWH 5208.333 Hz  
 FIDRES 0.158946 Hz  
 AQ 3.1457779 sec  
 RG 2048  
 DW 96.000 use  
 DE 137.14 use  
 TE 300.0 K  
 D1 1.00000000 sec  
 P1 8.70 use  
 SFO1 250.1315321 MHz  
 NUCLEUS 1H

F2 - Processing parameters  
 SI 16384  
 SF 250.1300049 MHz  
 WDM EM  
 SSB 0  
 LB 0.20 Hz  
 GB 0  
 PC 1.50

1D NMR plot parameters  
 CX 20.00 cm  
 CY 12.50 cm  
 F1P 12.000 ppm  
 F1 3001.56 Hz  
 F2P -0.500 ppm  
 F2 -125.07 Hz  
 PPMCM 0.62500 ppm  
 HZCM 156.33125 Hz/

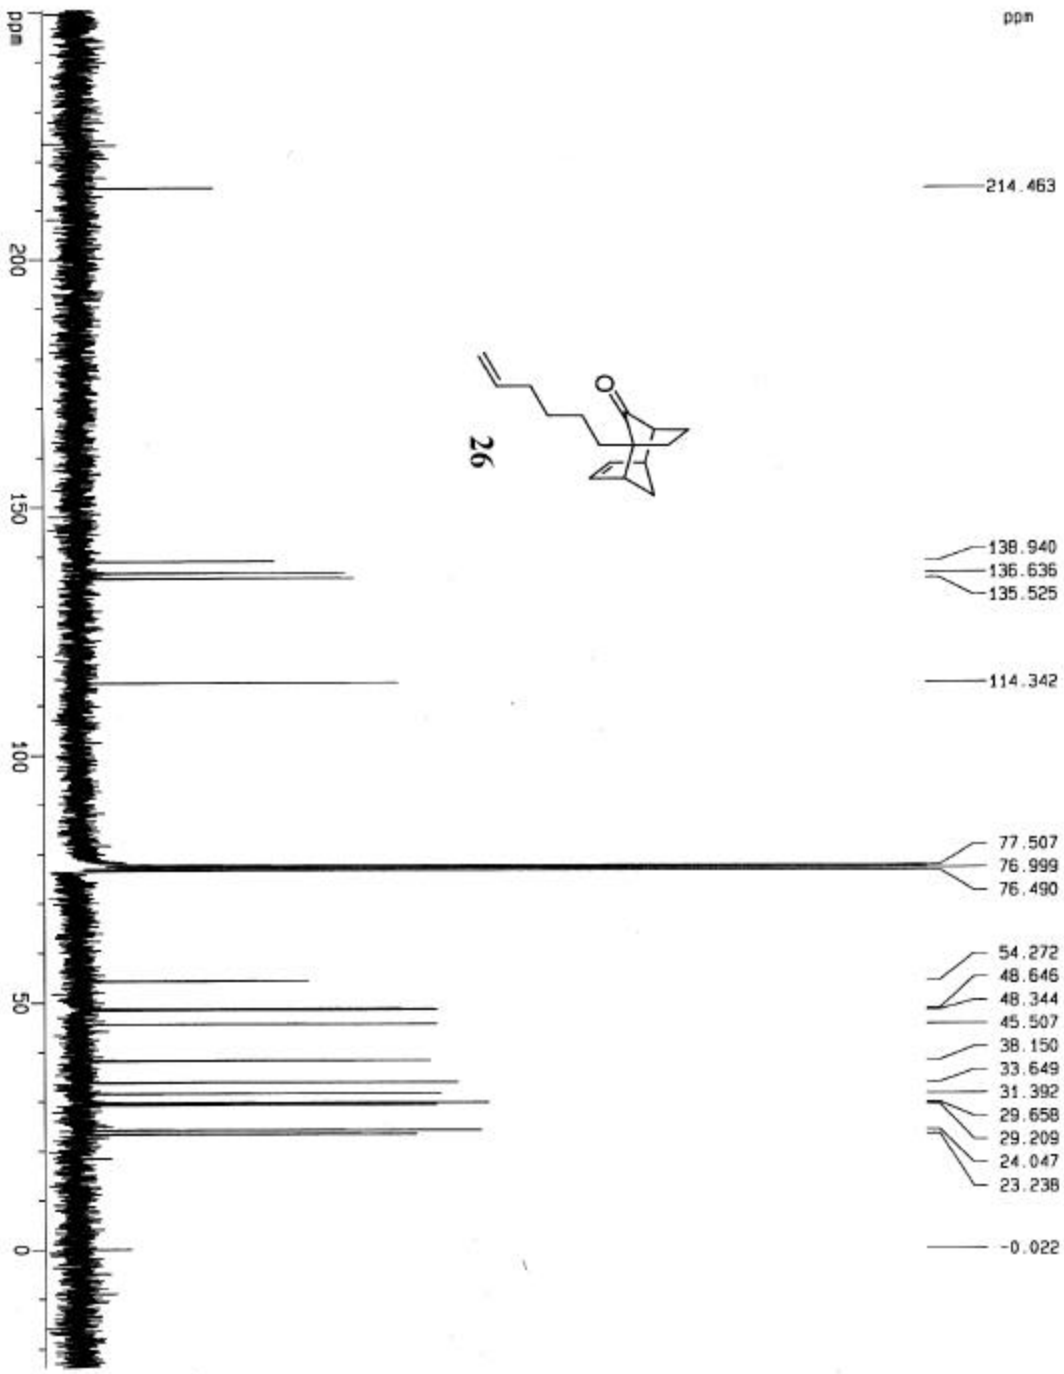

Current Data Parameters  
 NAME sw-III-107-A1  
 EXPNO 4  
 PROCNO 1

F2 - Acquisition Parameters  
 Date\_ 20020612  
 Time 11:48

INSTRUM arx250  
 PROBHD 5 mm QNP 1H  
 PULPROG zgpg30  
 TO 36964  
 SOLVENT CDCl3  
 NS 3957  
 DS 4

SMH 17241.379 Hz  
 FIDRES 0.457702 Hz  
 AQ 1.0591050 sec  
 RG 22800  
 DW 29.000 use  
 DE 41.43 use  
 TE 300.0 K

D12 0.00002000 sec  
 DLS 23.00 dB  
 OPDPRG waltz16  
 P31 103.00 use  
 D1 1.00000000 sec  
 P1 5.35 use

SF01 62.9023694 MHz  
 NUCLEUS 13C  
 D11 0.03000000 sec

F2 - Processing parameters  
 SI 32768  
 SF 62.8952403 MHz  
 MDW EM  
 SSB 0  
 LB 1.00 Hz  
 GB 0  
 PC 1.40

1D NMR plot parameters  
 CX 20.00 cm  
 CY 30.00 cm  
 F1P 250.413 ppm  
 F1 15749.81 Hz  
 F2P -23.715 ppm  
 F2 -1491.57 Hz  
 FREQM 13.70543 ppm  
 HZCM 862.06891 Hz/
